# Supplementary material for: Clinical pattern and predictors of stroke treatment outcome among hospitalised patients who had a stroke at Felege Hiwot comprehensive specialised hospital, northwest Ethiopia: a retrospective cross-sectional study
Source: PubMed Central journal article supplement — BMJ Open. 2020 Dec 31;10(12):e040238. doi: 10.1136/bmjopen-2020-040238 (PMC7780509; doi:10.1136/bmjopen-2020-040238), 2020-12-31
Supplement: bmjopen-2020-040238.draft_revisions.pdf [file bmjopen-2020-040238.draft_revisions.pdf]

# BMJ Open

BMJ Open is committed to open peer review. As part of this commitment we make the peer review history of every article we publish publicly available.

When an article is published we post the peer reviewers' comments and the authors' responses online. We also post the versions of the paper that were used during peer review. These are the versions that the peer review comments apply to.

The versions of the paper that follow are the versions that were submitted during the peer review process. They are not the versions of record or the final published versions. They should not be cited or distributed as the published version of this manuscript.

BMJ Open is an open access journal and the full, final, typeset and author-corrected version of record of the manuscript is available on our site with no access controls, subscription charges or pay-per-view fees (<http://bmjopen.bmj.com>).

If you have any questions on BMJ Open's open peer review process please email [info.bmjopen@bmj.com](mailto:info.bmjopen@bmj.com)

# BMJ Open

## Clinical pattern and predictors of stroke treatment outcome among hospitalized stroke patients at Felege Hiwot Comprehensive Specialized Hospital, North-west Ethiopia

|                               |                                                                                                                                                                                                                                                                                                                                                                                                                                                                                                                                                                                              |
|-------------------------------|----------------------------------------------------------------------------------------------------------------------------------------------------------------------------------------------------------------------------------------------------------------------------------------------------------------------------------------------------------------------------------------------------------------------------------------------------------------------------------------------------------------------------------------------------------------------------------------------|
| Journal:                      | <i>BMJ Open</i>                                                                                                                                                                                                                                                                                                                                                                                                                                                                                                                                                                              |
| Manuscript ID                 | bmjopen-2020-040238                                                                                                                                                                                                                                                                                                                                                                                                                                                                                                                                                                          |
| Article Type:                 | Original research                                                                                                                                                                                                                                                                                                                                                                                                                                                                                                                                                                            |
| Date Submitted by the Author: | 09-May-2020                                                                                                                                                                                                                                                                                                                                                                                                                                                                                                                                                                                  |
| Complete List of Authors:     | Kefale, Belayneh; Debre Tabor University, Clinical Pharmacy Unit and Research team, Department of Pharmacy, College of Health Sciences Ewunetei, Amien; Debre Tabor University, Pharmacology Unit and Research team, Department of Pharmacy, College of Health Sciences Molla, Mulugeta; Debre Tabor University, Pharmacology Unit and Research team, Department of Pharmacy, College of Health Sciences Tegegne, Gobezie ; Addis Ababa University College of Health Sciences Degu, Amsalu; United States International University-Africa, Department of Pharmaceutics and Pharmacy Practice |
| Keywords:                     | NEUROLOGY, Stroke < NEUROLOGY, Stroke medicine < INTERNAL MEDICINE                                                                                                                                                                                                                                                                                                                                                                                                                                                                                                                           |
|                               |                                                                                                                                                                                                                                                                                                                                                                                                                                                                                                                                                                                              |

SCHOLARONE™  
Manuscripts

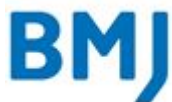

I, the Submitting Author has the right to grant and does grant on behalf of all authors of the Work (as defined in the below author licence), an exclusive licence and/or a non-exclusive licence for contributions from authors who are: i) UK Crown employees; ii) where BMJ has agreed a CC-BY licence shall apply, and/or iii) in accordance with the terms applicable for US Federal Government officers or employees acting as part of their official duties; on a worldwide, perpetual, irrevocable, royalty-free basis to BMJ Publishing Group Ltd ("BMJ") its licensees and where the relevant Journal is co-owned by BMJ to the co-owners of the Journal, to publish the Work in this journal and any other BMJ products and to exploit all rights, as set out in our [licence](#).

The Submitting Author accepts and understands that any supply made under these terms is made by BMJ to the Submitting Author unless you are acting as an employee on behalf of your employer or a postgraduate student of an affiliated institution which is paying any applicable article publishing charge ("APC") for Open Access articles. Where the Submitting Author wishes to make the Work available on an Open Access basis (and intends to pay the relevant APC), the terms of reuse of such Open Access shall be governed by a Creative Commons licence – details of these licences and which [Creative Commons](#) licence will apply to this Work are set out in our licence referred to above.

Other than as permitted in any relevant BMJ Author's Self Archiving Policies, I confirm this Work has not been accepted for publication elsewhere, is not being considered for publication elsewhere and does not duplicate material already published. I confirm all authors consent to publication of this Work and authorise the granting of this licence.

# Clinical pattern and predictors of stroke treatment outcome among hospitalized stroke patients at Felege Hiwot Comprehensive Specialized Hospital, North-west Ethiopia

Belayneh Kefale<sup>1\*</sup>, Amien Ewunetei<sup>2</sup>, Mulugeta Molla<sup>2</sup>, Gobezie T Tegegne<sup>3</sup> and Amsalu Degu<sup>4</sup>

<sup>1</sup>Clinical Pharmacy Unit and Research team, Department of Pharmacy, College of Health Sciences, Debre Tabor University, PO Box 272, Debre Tabor, Amhara, Ethiopia

<sup>2</sup>Pharmacology Unit and Research team, Department of Pharmacy, College of Health Sciences, Debre Tabor University, PO Box 272, Debre Tabor, Amhara, Ethiopia

<sup>3</sup>Department of Pharmacology and Clinical Pharmacy, School of Pharmacy, College of Health Sciences, Addis Ababa University, Addis Ababa, Ethiopia.

<sup>4</sup>Department of Pharmaceutics and Pharmacy Practice, School of Pharmacy and Health Sciences, United States International University-Africa, P.O. Box 14634 - 00800, Nairobi, Kenya

\*Correspondence author at: Clinical Pharmacy and Research Unit, Department of Pharmacy, College of Health Sciences, Debre Tabor University, Debre Tabor, Amhara, Ethiopia

E-mail address: [bkefale5@gmail.com](mailto:bkefale5@gmail.com) or [bkefale5@dtu.edu.et](mailto:bkefale5@dtu.edu.et) (Belayneh Kefale)

## Author Details

**Belayneh Kefale\*** Correspondence: Clinical Pharmacy Unit and Research team, Department of Pharmacy, College of Health Sciences, Debre Tabor University, PO Box 272, Debre Tabor, Amhara, Ethiopia.

Tel. +251913805289/90; Email - [bkefale5@gmail.com](mailto:bkefale5@gmail.com) or [bkefale5@dtu.edu.et](mailto:bkefale5@dtu.edu.et)

**Amien Ewunetei:** Pharmacology Unit and Research team, Department of Pharmacy, College of Health Sciences, Debre Tabor University, PO Box 272, Debre Tabor, Amhara, Ethiopia

Email- [amienpeace@gmail.com](mailto:amienpeace@gmail.com)

**Mulugeta Molla:** Pharmacology Unit and Research team, Department of Pharmacy, College of Health Sciences, Debre Tabor University, PO Box 272, Debre Tabor, Amhara, Ethiopia

Email- [mulugetamolla112@yahoo.com](mailto:mulugetamolla112@yahoo.com)

**Gobezie T Tegegne:** Department of Pharmacology and Clinical Pharmacy, School of Pharmacy, College of Health Sciences, Addis Ababa University, Addis Ababa, Ethiopia.

Email: [gob.ju2006@gmail.com](mailto:gob.ju2006@gmail.com)

**Amsalu Degu:** Department of Pharmaceutics and Pharmacy Practice, School of Pharmacy and Health Sciences, United States International University-Africa, P.O. Box 14634 - 00800, Nairobi, Kenya

Email: [amsaludegu@yahoo.com](mailto:amsaludegu@yahoo.com)

## Abstract

**Background:** Stroke is one of the most common causes of morbidity and mortality in sub-Saharan African countries including, Ethiopia in the 21<sup>st</sup> century. Hence, this study aimed to assess the clinical pattern and predictors of stroke treatment outcome among hospitalized patients in Felege Hiwot comprehensive specialized hospital in north-west Ethiopia.

**Methods:** A retrospective cross-sectional study was conducted among 597 stroke patients, who had been admitted to the medical ward of Felege Hiwot Comprehensive Specialized Hospital (FHCSH) from 2015–2019. Multiple stepwise backward logistic regression analysis was done for a P value of < 0.25 to identify the independent predictors of treatment outcome. Statistical significance was set at  $p < 0.05$ .

**Result:** In the present study, 317 (53.1%) were males and the mean age of the study participants was  $61.08 \pm 13.76$ . About two-thirds of patients (392, 65.7%) were diagnosed with ischemic stroke. Regarding clinical pattern, about 203 (34.0%) of patients complained of right-side body weakness, and the major co-morbid condition identified was hypertension (216, 64.9%). Overall, 276 (46.2%) of them had poor treatment outcomes, and 101 (16.9%) of them died. Patients who cannot read and write (AOR=42.89, 95% CI: 13.23-111.28,  $p < 0.001$ ), attend primary school (AOR=22.11, 95% CI: 6.98-55.99,  $p < 0.001$ ) and secondary school (AOR=4.20, 95% CI: 1.42-12.51,  $p < 0.001$ ), diagnosed with hemorrhagic stroke (AOR=2.68, 95% CI: 1.62-4.43,  $p < 0.001$ ) and delayed hospital arrival more than 24 hours (AOR= 2.92, 95% CI: 1.83-4.66,  $p = 0.001$ ) were the independent predictors of poor treatment outcome.

**Conclusion:** Approximately, half of the stroke patients had poor treatment outcomes. Ischemic stroke was the most predominantly diagnosed stroke type. Education status, types of stroke, and the median time from onset of symptoms to hospitalization were the predictors of treatment outcome. Therefore, an appropriate prevention method should be designed to reduce stroke complications and mortality.

## Strengths and limitations of this study

- This study has provided a real insight into the current treatment outcome and clinical pattern among hospitalized stroke patients in northwest Ethiopia.
- Around 600 patients were included in this study which allowed us to identify the potential predictors of stroke treatment outcome.
- As this study was based on a retrospective chart review, the data obtained might be affected by the documentation culture of the hospital and the health care providers.
- In this study a significant number of patients discharged against medical advice, some stroke victims may die before reaching the hospital, and the study was done in a single setting, which may affect the generalizability of the data to the entire population.
- Therefore, a prospective study in a multicenter setting would be better to accurately describe the clinical pattern and treatment outcome of stroke in Ethiopia.

**Keywords:** Neurology, stroke, stroke medicine.

## 1. Background

Stroke is one of the most common causes of morbidity and mortality in both developing and developed countries in the 21<sup>st</sup> century. Despite geographical variation in the lifetime risk of stroke, one in four persons whose age is 25 years and above develops stroke during his or her lifetime (1). Currently, central nervous system infarction is defined as the brain, spinal cord, or retinal cell death attributable to ischemia in a specified vascular territory, based on neuropathological, neuroimaging, and/or clinical evidence of ischemic injury with symptoms persisting lasting 24 hours or longer after exclusion of other etiologies (2, 3). It is associated with a severe medical conditions with high complications that are caused by reduced blood flow to the brain (4, 5). According to the American Heart Association (AHA) report, stroke can be generally classified into either ischemic due to blood clot in the artery that supplies the brain or hemorrhagic due to intracranial bleeding (6, 7). Various studies showed that ischemic stroke (52.5% - 87%) is the most frequently diagnosed type of stroke as compared to hemorrhagic stroke (8, 9). Ischemic stroke is significantly less fatal than a hemorrhagic type of stroke, with 30-day case-fatality rates of 46.5% for hemorrhagic stroke compared to 9% to 23% in ischemic stroke (7). Worldwide, it is the second leading cause of mortality, accounting for 10% of all deaths, and killing 5.5million people each year (4, 10, 11). According to the 2016 report of the

1  
2  
3 World Health Organization (WHO) and The Global Burden of Diseases, Injuries, and Risk  
4 Factors Study (GBD), there were 33 million people with stroke with an incidence of 15 million  
5 and 5 million stroke deaths and 116.4 million disability-adjusted life-years (12, 13), and the  
6 stroke burden will be doubled if the trend continues by the year 2030 (14).  
7  
8  
9

10 In western countries, it is the third most common cause of morbidity and mortality next to cancer  
11 and coronary artery disease with mortality rates of 17% - 34% in the first month of post-stroke  
12 days and 25% - 40% in the first 12 months (15, 16). Despite a 35% reduction in stroke mortality  
13 between 2001 and 2011, a stroke occurred in the United States at a rate of almost 800,000 per  
14 year and resulted in 128,932 deaths in 2011 (17). In developing countries, the incidence of stroke  
15 is rapidly increasing due to the high prevalence of hypertension, diabetes, obesity, smoking and  
16 other non-communicable diseases (6, 18, 19), and 86% of all stroke associated deaths globally  
17 were occurred in low and middle-income countries (20). In Africa, the incidence of stroke-  
18 related morbidity and mortality is increasing due to the high prevalence of various risk factors  
19 such as hypertension, diabetes mellitus, smoking, older age and alcohol(4, 16, 21-23).  
20  
21  
22  
23  
24  
25  
26

27 A recent community survey undertaken in African countries showed stroke prevalence was  
28 between 200 and 300 per 100,000 populations (24), and its prevalence is increasing compared to  
29 the previous African stroke report (58–68 per 100,000) (25). In eastern sub-Saharan African  
30 countries, the estimated lifetime risk of developing stroke was 11.8% (26). Further, despite  
31 comprehensive data regarding stroke burden in Ethiopia are scarce, observational studies showed  
32 that it is one of the commonest reasons for hospital admission (8, 27) and its incidence is  
33 increasing annually(28).  
34  
35  
36  
37  
38

39 As per the WHO stroke mortality report, stroke mortality was estimated to be 122–153.8 per  
40 100,000 people in Ethiopia (29). As patients usually present late, and the standard of care is poor  
41 as compared to developed countries, the mortality rate among hospitalized stroke patients is  
42 expected to be higher despite the lack of comprehensive studies. Most of the information  
43 regarding stroke mortality and its determinants that we use in the management of stroke comes  
44 from studies in developed countries. Therefore, it is imperative that a lot has to be done to  
45 address the issues concerning the burden of stroke, risk factors, and mortality in Ethiopia (5).  
46 Hence, the present study was aimed to assess the clinical pattern and predictors of stroke  
47 treatment outcome among hospitalized stroke patients at the medical ward of FHSCH.  
48  
49  
50  
51  
52  
53  
54  
55  
56  
57  
58  
59  
60

## 2. Methods

### 2.1. Study design and period

A retrospective cross-sectional study was conducted at Felege Hiwot Comprehensive Specialized Hospital, Bahir Dar town, which is located 665km from North-west of Addis Ababa. The hospital provides different clinical services for 12 million populations in the catchment area and serves as a referral for other primary and general hospitals as well as a teaching hospital for Bahir Dar University. The data were collected from January to February 2020. Five hundred ninety-seven (597) stroke patients were included based on the eligibility criteria.

### 2.2. Eligibility criteria

All adult ( $\geq 18$  years) stroke patients who had been admitted to the medical ward of FHSCH during 2015-2019 were included in the study. However, patients with incomplete medical records (i.e., incomplete treatment regimen and the status of the patients after treatment) were excluded in the study.

### 2.3. Data collection instrument and procedure

Data abstraction format was adapted from various relevant literature, and further modified based on the pretest result, which was undertaken in 5% of hospitalized stroke patients' medical card. The format contained socio-demographic patient characteristics, clinically related information, previous, current and discharge medications used, and co-morbidities, complications, time from onset of symptoms to hospitalization, length of hospital stay, type of stroke, and treatment outcome status. These data were collected from the patients' medical records. Six trained clinical pharmacists were participated in the data collection.

### 2.4. Data analysis

The collected data were entered and analyzed using SPSS version 25.0 statistical software. Descriptive statistics such as frequency, percentage, and mean with standard deviations were used to describe the independent variables. Multiple stepwise backward logistic regression analysis was done for a P value of  $< 0.25$  to identify the independent predictors of treatment outcome. Statistical significance was set at  $p < 0.05$ .



## 2.5. Ethical Consideration

The study was approved by the Ethical review board of Debre Tabor University, College of Health Sciences (DTU/RE/1/170/12). Patients' personnel information and clinical information were recorded by ensuring patient confidentiality.

## 2.6. Patient and public involvement

Patients were not involved in the design and conduction of this study. Patients were not invited to comment on the study design and were not consulted to develop patient relevant outcomes or interpret the results. Patients were not invited to contribute to the writing or editing of this document for readability or accuracy.

## 2.7. Operational Definition

**Undetermined type of stroke:** A type of stroke neither ischemic nor hemorrhagic, not clearly identified.

**Improved or good outcome:** If the patient is discharged without complication or if patient discharge with improvement.

**Poor outcome:** If the patient is discharged with complication, or referred to higher health facility, or left against medical advice or death.

## 3. Results

### 3.1 Socio demographic characteristics of patients

In the present study, a total of 597 study participants were included. Males were accounted for 317 (53.1%). Mean age of the study participants was  $61.08 \pm 13.76$ , with the age range of 25 - 98 years. Approximately, 252 (42.2%) of the patients were in the age range of 56–70 years. In addition, 191 (33.0%) and 152 (25.5%) of study participants attended primary and higher education, respectively. Occupationally, the majority 225 (37.7%) of participants in the study, were farmers. (Table 1).

Table 1: Socio-demographic characteristics of stroke patients hospitalized at Felege Hiwot Comprehensive Specialized Hospital, North west Ethiopia, 2020.

| Variables                 | Categories          | Frequency (%)   |                    |              |            |
|---------------------------|---------------------|-----------------|--------------------|--------------|------------|
|                           |                     | Ischemic stroke | Hemorrhagic stroke | Undetermined | Total      |
| <b>Sex</b>                | Male                | 217 (55.4)      | 89 (47.3)          | 11 (64.7)    | 317 (53.1) |
|                           | Female              | 175 (44.6)      | 99 (52.7)          | 6 (35.3)     | 280 (46.9) |
| <b>Age</b>                | <40                 | 20 (5.1)        | 27 (14.4)          | 2 (11.8)     | 49 (8.2)   |
|                           | 41-55               | 100 (25.5)      | 44 (23.4)          | 2 (11.8)     | 146 (24.5) |
|                           | 56-70               | 168 (42.9)      | 81(43.1)           | 3 (17.6)     | 252 (42.2) |
|                           | >70                 | 104 (26.5)      | 36 (19.1)          | 10 (58.8)    | 150 (25.1) |
| <b>Occupation</b>         | Farmer              | 150 (38.3)      | 67(35.6)           | 8 (47.1)     | 225 (37.7) |
|                           | Employed            | 76 (19.4)       | 35 (18.6)          | 2 (11.8)     | 113 (18.9) |
|                           | Unemployed          | 34 (8.7)        | 20 (10.6)          | 1 (5.9)      | 55 (9.2)   |
|                           | Housewife           | 85 (21.7)       | 58 (30.9)          | 4 (23.5)     | 147 (24.6) |
|                           | Retired             | 47 (12)         | 8 (4.3)            | 2 (11.8)     | 57 (9.5)   |
| <b>Educational status</b> | Cannot read & write | 93 (23.7)       | 53 (28.2)          | 6 (35.3)     | 152 (25.5) |
|                           | Primary             | 70 (17.9)       | 44 (23.4)          | 3 (17.6)     | 117 (19.6) |
|                           | Secondary           | 92 (23.5)       | 42 (22.3)          | 3 (17.6)     | 137 (22.9) |
|                           | Higher education    | 137 (34.9)      | 49 (26.1)          | 5 (29.4)     | 191 (32.0) |
| <b>Residence</b>          | Urban               | 206 (52.6)      | 65 (34.6)          | 7 (41.2)     | 278 (46.6) |
|                           | Rural               | 186 (47.4)      | 123 (65.4)         | 10 (58.8)    | 319.4)     |

### 3.2. Clinical characteristics of stroke patients

About two-thirds of the participants in this study (392, 65.7%) were diagnosed with ischemic stroke while 188 (31.5%) of patients had a hemorrhagic stroke. The mean time from the onset of symptoms until arrival at the hospital was 23.67 hours. In addition, the median length of hospital stay was 5.55 ±3.29 days, and more than half of the patients (345, 57.8 %) remained in the hospital for five or fewer days.

Approximately, one-third of the study participants complained about body weakness on the right side (203, 34.0 %), followed by body weakness on the left side 194 (32.5%). Moreover, more than half of stroke patients 333 (55.8%) had at least one comorbid condition, of which the most

common comorbid conditions were hypertension 219 (64.9%), atrial fibrillation 114 (34.2%), and diabetes mellitus 83 (24.9%).

Hypertension was primarily prevalent in hemorrhagic stroke 158 (84 %) compared with patients with ischemic stroke 175 (44.6%). The most common complications of stroke were aspiration pneumonia (125, 64.4%) and elevated intracranial pressure (57, 29.4%) (Table 2).

Table 2: Clinical characteristics of stroke patients hospitalized at Felege Hiwot Comprehensive Specialized Hospital, North west Ethiopia, 2020.

| Variables                            | Category                 | Frequency (%) |
|--------------------------------------|--------------------------|---------------|
| <b>Clinical presentation</b>         | Right side body weakness | 203 (34.0)    |
|                                      | Left side body weakness  | 194 (32.5)    |
|                                      | Loss of consciousness    | 103 (17.3)    |
|                                      | Aphasia                  | 97 (16.2)     |
| <b>Types of stroke</b>               | Ischemic stroke          | 392 (65.7)    |
|                                      | Hemorrhagic stroke       | 188 (31.5)    |
|                                      | Undetermined             | 17 (2.8)      |
| <b>Co-morbid status</b>              | Absent                   | 264 (44.2)    |
|                                      | Present                  | 333 (55.8)    |
| <b>Specific co-morbid conditions</b> | Hypertension             | 216 (64.9)    |
|                                      | Atrial fibrillation      | 114 (34.2)    |
|                                      | Diabetes mellitus        | 83 (24.9)     |
|                                      | Congestive heart failure | 37 (11.1)     |
|                                      | Epilepsy                 | 33 (9.9)      |
|                                      | Hyperlipidemia           | 22 (6.6)      |
|                                      | Others*                  | 31 (9.3)      |
| <b>Complication status</b>           | Absent                   | 403 (67.5)    |
|                                      | Present                  | 194 (32.5)    |
| <b>Specific complications</b>        | Aspiration pneumonia     | 125 (64.4)    |
|                                      | Increased ICP            | 57 (29.4)     |
|                                      | Septic shock             | 29 (14.9)     |
|                                      | Bed sore                 | 23 (11.9)     |

|                                           |             |                 |
|-------------------------------------------|-------------|-----------------|
|                                           | Others*     | 17 (8.8)        |
| <b>Time from onset to hospitalization</b> | <12 hours   | 117(19.6)       |
|                                           | 12-24 hours | 204 (34.2)      |
|                                           | 25-48hours  | 130 (21.8)      |
|                                           | >48hours    | 146 (24.5)      |
| <b>Length of hospital stay</b>            | ≤ 5days     | 345 (57.8)      |
|                                           | > 5days     | 252 (42.2)      |
|                                           | Mean day    | 5.55 ±3.29 days |

‡(Urinary tract infection, HIV/AIDs, lipoma, asthma, glaucoma, breast cancer), \*(seizure, acute renal failure, diabetic ketoacidosis, hypokalemia, eclampsia), ICP: intracranial pressure

### 3.3. Management pattern of stroke patients

About half of patients with stroke (333, 55.8 %) had a history of medication. During admission, 12.2% and 9.0% of patients were used enalapril and nifedipine, respectively. In addition, 352 (59 %) stroke patients used combinations of acetylsalicylic acid and atorvastatin, while 103 (17.3%) patients received support/physiotherapy during hospitalization. Cimetidine (154, 25.8%) and a combination of metronidazole, ceftriaxone, and cimetidine 110 (18.4%) were the major concomitantly administered medications. Besides, acetylsalicylic acid 321 (53.8%), and acetylsalicylic acid and atorvastatin combination (97, 16.2%) were the frequent discharge medications, while nifedipine (147, 24.6%) was the most commonly concomitantly prescribed drug upon discharge. 227 (38.0%) stroke patients were prescribed non-fractionated heparin for the prevention of deep venous thrombosis during hospitalization (Table 3).

Table 3: Management pattern among stroke patients hospitalized at Felege Hiwot Comprehensive Specialized Hospital, North west Ethiopia, 2020

| Management practice     | Categories                       | Frequency (n) | Percentage (%) |
|-------------------------|----------------------------------|---------------|----------------|
| Past medication history | Enalapril                        | 73            | 12.2           |
|                         | Oral hypoglycemic                | 45            | 7.5            |
|                         | Nifedipine                       | 54            | 9.0            |
|                         | Hydrochlorothiazide              | 38            | 6.4            |
|                         | Nifedipine + hydrochlorothiazide | 32            | 5.4            |
|                         | Atorvastatin                     | 27            | 4.5            |

|                         |                                          |     |      |
|-------------------------|------------------------------------------|-----|------|
|                         | Phenytoin                                | 24  | 4.0  |
|                         | Insulin                                  | 15  | 2.5  |
|                         | Others*                                  | 25  | 4.2  |
|                         | None                                     | 264 | 44.2 |
| Medications used to     | ASA + Atorvastatin                       | 352 | 59.0 |
| treat stroke during     | Supportive therapy/physiotherapy         | 103 | 17.3 |
| hospitalization         | ASA                                      | 54  | 9.0  |
|                         | Atorvastatin                             | 52  | 8.7  |
|                         | ASA+ Atorvastatin + physiotherapy        | 36  | 6.0  |
| Concomitantly           | Cimetidine                               | 154 | 25.8 |
| administered drugs for  | Ceftriaxone + metronidazole + Cimetidine | 110 | 18.4 |
| hospitalized stroke     | Heparin                                  | 71  | 11.9 |
| patients                | Ceftriaxone + metronidazole              | 52  | 8.7  |
|                         | Mannitol                                 | 52  | 8.7  |
|                         | Bisacodyl                                | 43  | 7.2  |
|                         | Metoprolol                               | 34  | 5.7  |
|                         | Warfarin                                 | 30  | 5.0  |
|                         | Mannitol +Ranitidine                     | 32  | 5.4  |
|                         | Ceftriaxone + Cimetidine                 | 19  | 3.2  |
| Medications give at     | ASA                                      | 321 | 53.8 |
| discharge for treatment | ASA + Atorvastatin                       | 97  | 16.2 |
| of stroke               | Atorvastatin                             | 78  | 13.1 |
| Concurrently            | Nifedipine                               | 147 | 24.6 |
| prescribed drug         | Metoprolol                               | 91  | 15.2 |
| prescribed during       | Ranitidine                               | 89  | 14.9 |
| discharge               | Enalapril                                | 82  | 13.7 |
|                         | Omeprazole                               | 41  | 6.9  |
|                         | Phenytoin                                | 28  | 4.7  |
|                         | Digoxin                                  | 18  | 3.0  |

\*(HAART, salbutamol, antibiotics and anticancer), ASA: acetylsalicylic acid (aspirin)

### 3.3. Treatment outcome and associated factors

As shown in Figure 1, more than half of the stroke patients (321, 53.8%) were discharged with improvement. Contrastingly, 97 (16.2%) and 78 (13.1%) patients were referred to other facilities and left against medical advice upon self and family requests, respectively. In addition, 101 (16.9%) patients have died (figure 1).

Figure 1: Distribution of stroke patients by their outcomes.

More than half (57, 56.4%) of patients with death outcome had greater than 1-week hospital stay, and 119 (30.1%), 36 (46.2%) and 36 (36.1%) of patients with an outcome of improved, left against medical advice and referred to other health facility had 4-5 days' hospital stay (figure 2).

Figure 2: Distribution of patient outcomes by duration of hospital stay

The present study showed that the majority of patients (63, 62.4%) with a hemorrhagic stroke had fatal outcomes. On the other hand, more patients with ischemic stroke have been improved, referred to other healthcare facilities, and left to medical advice than hemorrhagic stroke cases (Table 4).

Table 4: Distribution of patients' outcomes by stroke types

| Patient outcomes                                               | Types of stroke |                    |              | Total       |
|----------------------------------------------------------------|-----------------|--------------------|--------------|-------------|
|                                                                | Ischemic stroke | Hemorrhagic stroke | Undetermined |             |
| <b>Improved</b>                                                | 238 (74.1%)     | 74 (23.1%)         | 9 (3.8%)     | 321 (53.8%) |
| <b>Referred to other health facility</b>                       | 65 (67%)        | 31 (32%)           | 1 (1%)       | 97 (16.2%)  |
| <b>Left against medical advice on self and family requests</b> | 57 (73.1%)      | 20 (25.6%)         | 1 (1.3%)     | 78 (13.1%)  |
| <b>Death</b>                                                   | 32 (31.7%)      | 63 (62.4%)         | 6 (5.9%)     | 101 (16.9%) |
| <b>Total</b>                                                   | 392 (65.7%)     | 188 (31.5%)        | 17 (2.8%)    | 597 (100%)  |

The multivariate logistic regression model showed that educational status, types of stroke, and the median time from onset of symptoms to hospitalization were significant predictors of stroke treatment outcome.

Accordingly, patients who cannot read and write, attend primary and secondary school were about forty-three (AOR=42.89, 95% CI: 13.23-111.28,  $p<0.001$ ), twenty-two (AOR=22.11, 95% CI: 6.98-55.99,  $p<0.001$ ) and four (AOR=4.20, 95% CI: 1.42-12.51,  $p<0.001$ ) times more likely to have a risk of poor treatment outcome, respectively. Besides, patients diagnosed with a hemorrhagic type of stroke were three (AOR=2.68, 95% CI: 1.62-4.43,  $p<0.001$ ) times more likely to have poor treatment outcomes than ischemic stroke patients. Further, patients with a median time from symptom onset to hospitalization greater than 24 hours were three (AOR=2.92, 95% CI: 1.83-4.66,  $p=0.001$ ) times more likely to have poor treatment outcomes as compared to their counterparts (Table 5).

Table 5: Univariate and multivariate binary logistic regression analysis of predictors of treatment outcome

| Variables          | Categories          | Treatment outcome |      | Univariate analysis     | Multivariate analysis  |         |
|--------------------|---------------------|-------------------|------|-------------------------|------------------------|---------|
|                    |                     | Good              | Poor | COR (95% CI)            | AOR (95% CI)           | P-Value |
| Sex                | Male                | 162               | 155  | 1                       | 1                      |         |
|                    | Female              | 159               | 121  | 0.78 (0.58 - 1.01) *    | 0.86 (0.42 - 1.75)     | 0.679   |
| Age                | <40                 | 12                | 37   | 1.73 (0.84 - 3.60) *    | 2.23 (0.79 - 6.31)     | 0.130   |
|                    | 41-55               | 98                | 48   | 0.28 (0.17 - 0.45) *    | 0.53 (0.16 - 0.69)     | 0.071   |
|                    | 57-70               | 157               | 95   | 0.34 (0.22 - 0.52) *    | 0.31 (0.16 - 0.61)     | 0.068   |
|                    | >70                 | 54                | 96   | 1                       | 1                      |         |
| Educational status | Cannot read & write | 30                | 122  | 36.81 (19.81 - 68.42) * | 42.89 (13.23 - 111.28) | <0.001  |
|                    | Primary             | 33                | 84   | 23.04 (12.37 - 42.91) * | 22.11(6.98-55.99)      | <0.001  |
|                    | Secondary           | 86                | 55   | 5.37 (2.99 - 9.66) *    | 4.20 (1.42 - 12.51)    | <0.001  |
| Occupation         | Higher education    | 172               | 19   | 1                       | 1                      |         |
|                    | Farmer              | 82                | 143  | 4.88 (2.55 - 9.35) *    | 0.52 (0.14 - 1.94)     | 0.330   |
|                    | Employed            | 102               | 11   | 0.30 (0.13 - 0.71) *    | 0.85 (0.27 - 2.72)     | 0.789   |
|                    | Unemployed          | 30                | 25   | 2.33 (1.06 - 5.16) *    | 0.56 (0.14 - 2.28)     | 0.417   |

|                                                             |                    |     |     |                      |                    |        |
|-------------------------------------------------------------|--------------------|-----|-----|----------------------|--------------------|--------|
|                                                             | House wife         | 65  | 82  | 3.53 (1.80 - 6.93) * | 0.55 (0.14 - 2.06) | 0.362  |
|                                                             | Retired            | 42  | 15  | 1                    | 1                  |        |
| <b>Types of stroke</b>                                      | Ischemic stroke    | 238 | 154 | 1                    | 1                  |        |
|                                                             | Hemorrhagic stroke | 74  | 114 | 2.38 (1.67 - 3.40) * | 2.68 (1.62 - 4.43) | <0.001 |
|                                                             | Undetermined       | 9   | 8   | 1.37 (0.52 - 3.64)   | 0.35 (0.09 - 1.43) | 0.143  |
| <b>Length of hospital stay</b>                              | ≤ 5days            | 207 | 138 | 1                    | 1                  |        |
|                                                             | > 5days            | 114 | 138 | 1.82 (1.31 - 2.52) * | 1.70 (1.04 - 2.79) | 0.056  |
| <b>Median time from onset of symptom to hospitalization</b> | ≤24hrs             | 207 | 114 | 1                    | 1                  |        |
|                                                             | >24hr              | 114 | 162 | 2.58 (1.85 - 3.59) * | 2.92 (1.83 - 4.66) | 0.001  |
| <b>Co-morbidity status</b>                                  | Absence            | 166 | 178 | 1                    | 1                  |        |
|                                                             | Present            | 155 | 175 | 1.95 (1.40 - 2.71) * | 1.38 (0.85 - 2.22) | 0.192  |

Note: AOR: Adjusted Odds ratio; COR: Crudes Odds ratio; CI: Confidence interval.

\* Shows statistically significant at p value < 0.25 during univariate analysis.

#### 4. Discussion

A five-year retrospective cross-sectional study was conducted to describe the clinical patterns and treatment outcome of patients with stroke admitted to the medical ward of FHSC. The mean age of patients in this study was 63.2±12.6 years, which is consistent with other previous hospital-based studies in Ethiopia where the mean age of stroke patients ranged from 56-66 years (8, 9, 22). The existence of multiple co-morbidities such as hypertension, heart disease, and diabetes may be due to the high prevalence of stroke in the elderly. This is, however, lower than studies carried out in Iran (16) and USA (30), and higher than other studies conducted in Ethiopia (27, 29, 31), Sri Lanka (31) and India (32). This disparity may be due to differences in socio-demographic factors, sample size, and the method used in the studies. The prevalence of stroke in males was significantly higher than in females that are consistent with other cross-sectional studies in Ethiopia (9, 22, 33), Nigeria (34, 35), Kenya (19), Zambia (36), India(32, 37), Iran (16) and Sri Lanka(31). The high prevalence of stroke in males may be attributed to the increased habit of drinking alcohol and smoking cigarettes. Other studies performed by Greffie,



1  
2  
3 *et al.*, and Connor, *et al.* (24, 38) showed, however, that stroke is mainly diagnosed in females.  
4 This might be explained by the presence of different risk factors such as pregnancy-related  
5 disorders and the frequent use of contraceptives in females in those studies.  
6  
7

8  
9 The finding of this study also revealed that ischemic stroke was predominant in 65.7% of total  
10 stroke victims. Previously related research found more prevalence of ischemic stroke as opposed  
11 to hemorrhagic stroke (6, 8, 22, 31, 38, 39). Contrastingly, hemorrhagic stroke was the most  
12 common in studies conducted at St. Paul's Teaching Hospital (61.3% ) (40), Jimma (64.3%) (41)  
13 and Rwanda (65%) (42). This disparity could probably due to the difference in the study area,  
14 socioeconomic status, study design, and the prevalence of risk factors and co-morbidities,  
15 especially cardiovascular risk factors in St. Paul's Teaching Hospital, Jimma, and Rwanda.  
16 Moreover, 55.8% of the study participants had one or more co-morbid conditions before hospital  
17 admission due to stroke. Hypertension was the most prevalent co-morbid disease, which was  
18 diagnosed in nearly two-thirds of the study participants with co-morbid conditions. This is  
19 consistent with other studies in Ethiopia (40, 43), Tanzania and Sri Lanka (31, 44), which  
20 reported that hypertension was the most common co-morbid condition in patients with stroke.  
21 Furthermore, research performed by Fekadu *et al.* (9), Gebremariam & Yang (22), and Rymer  
22 (45), showed that high blood pressure and aging blood vessels constituted a major risk factor for  
23 stroke development. The likely explanation for the high prevalence of hypertension could be  
24 poor life style & public awareness and inaccessible of health facilities in developing countries.  
25 This study showed that almost one-third of the stroke patients complained about the weakness of  
26 the body on the right-side during admission. Previous studies in Ethiopia and Gambia have also  
27 shown that left side body weakness is the most frequently reported clinical presentation (9, 18).  
28 On the other hand, studies conducted by Greffie, *et al.*(38), Gedefa *et al.*(40), Masood *et al.*(46),  
29 and Patne *et al.*(37) reported that patients with stroke had a motor symptom and focal  
30 neurological deficit at admission. The disparities probably could be the anatomic involvement,  
31 prior history of co-morbidities, and development of complications.  
32  
33  
34  
35  
36  
37  
38  
39  
40  
41  
42  
43  
44  
45  
46  
47  
48

49 In FHSC, Enalapril, nifedipine, and hydrochlorothiazide were the most frequently used past  
50 medication regimens in the management of co-morbidities. This finding is in line with various  
51 studies conducted on the management of hypertension with stroke (9).  
52  
53

54 ACE inhibitor-based regimens are widely used for the treatment of high blood pressure, which is  
55 the major modifiable risk factor for stroke. Reducing blood pressure, therefore, improves  
56  
57

1  
2  
3 outcomes for patients with stroke. Various epidemiological studies done by Lawes *et al.* (47),  
4 Elliott (48), Beckett *et al.* (49) revealed that showed that screening and lowering of both systolic  
5 blood pressure and diastolic blood pressure was the most effective goal for reducing  
6 cardiovascular disease and for preventing recurrence and stroke mortality. In our setting, the  
7 mean length of hospitalization was found to be 5.55 days which is comparable with other studies  
8 conducted by Temesgen *et al.* (6.7 days) (8) and Desita *et al.* (6 days) (33). Conversely, the  
9 mean length of hospital stay at FHSC was shorter than the studies performed by Gedefa *et*  
10 *al.*(40), Gebreyohannes *et al.*(50), de Carvalho *et al.* (51), and Walker *et al.* (44) which were  
11 11.14, 11.55, 15.4 and 19 days, respectively.

12  
13 In this study setting, a significant proportion of stroke patients were died, referred to other health  
14 facilities, and discharged left against medical advice upon self and family requests rapidly. These  
15 disparities could be explained in various ways, such as availability of rehabilitation centers and  
16 other referral sites, treatment set up, costs for medication and beds, and quality of health care. In  
17 terms of management pattern, the combinations of acetylsalicylic acid and atorvastatin (65%)  
18 were used primarily in the ischemic stroke care in the study setting during hospitalization. This  
19 finding is in agreement with previous studies, which indicated that antiplatelet and dyslipidemias  
20 medications were frequently prescribed (8, 16, 52). The frequent usage might be due to the  
21 superior pharmacological effects of statins in reducing cardiovascular risks relative to other lipid-  
22 lowering agents, and antiplatelet is the most well-studied medications for the treatment of  
23 ischemic stroke (8, 53). However, this result contrasts with numerous studies performed by  
24 Bernheisel *et al.* (54) and Adams *et al.* (55), which stated that tissue plasminogen activator  
25 intravenous injection was primarily used in ischemic stroke treatment. This will possibly be  
26 attributed to the financial constraints and inaccessibility of tissue plasminogen activator in the  
27 study setting.

28  
29 In 44.7% of hemorrhagic stroke patients, mannitol was used to reduce cerebral edema. Despite  
30 the effectiveness of mannitol in hemorrhagic stroke needs further investigations, different  
31 clinical trials done by Wang *et al.* (56), and Aminmansour *et al.* (57) reported that the initial use  
32 of mannitol seemed safe but might not reduce hemorrhage size. Cimetidine alone and the  
33 combinations of ceftriaxone, metronidazole, and cimetidine were the most widely used  
34 medications in the treatment of hospital-acquired infections and the prevention of stress-induced  
35 ulcer during hospitalization.

1  
2  
3 Regarding the treatment outcome of stroke patients, the mortality rate was recorded in 16.9% of  
4 patients. The mortality rate in the study setting is relatively higher as compared to other  
5 studies by Gebremariam *et al.* (22), Kassaw (43), Greffie *et al.* (38), Temesgen *et al.* (8),  
6 Gebremariam *et al.* (22), and de Carvalho *et al.* (51). However, it is lower compared to studies at  
7 St. Paul's Teaching Hospital (30.1%) (40) and Jimma University Hospital (37.87%) (41). This  
8 disparity could have been due to the high prevalence of hemorrhagic stroke, the difference in  
9 approach to treatment at St. Paul's Teaching Hospital and the Jimma University Hospital. In  
10 general, in our study, 53.8% of patients had good outcomes while, 46.2% had poor outcome (left  
11 with complication, referred to other facilities and died). The finding is in line with previous  
12 studies where 54.8% and 59.2% of patients with stroke had good outcome (8, 40).

13  
14  
15 Although respiratory failure secondary to aspiration pneumonia has not been significantly  
16 associated with treatment outcomes, it was a frequent contributor to death in our study setting. It  
17 is consistent with other hospital-based studies conducted at Gondar University Teaching Hospital  
18 (22) and China (52). Contrastingly, a study conducted in Rwanda found that initial presentation  
19 with severe stroke was the leading cause of death among patients with stroke (42).

20  
21  
22 The binary logistic regression model analysis found that the treatment outcome was significantly  
23 associated with educational status, the mean time from onset of symptoms to hospitalization, and  
24 types of stroke. This contrasts with the study in the Shashemene Referral Hospital, which  
25 showed that none of the independent variables were significantly associated with the outcome  
26 (8). This variation may be attributed to the small sample size (73 patients with stroke) in that  
27 study. The current research found that stroke patients with a high educational level have a better  
28 treatment outcome than patients with a low educational level. This result is similar to other  
29 previous research carried out at Nekemte Referral Hospital, which found that study participants  
30 with higher educational level have better treatment outcome (9). Educated participants may  
31 likely have improved access to information about their health status, better economic situation,  
32 better awareness about detecting and managing risk factors of stroke, and higher capacity to  
33 evaluate stressful events. Stroke patients with a low level of education are often believed to  
34 disregard self-management behavior and adherence to their medications. Consequently, the low  
35 educational status can contribute to the poor outcome of stroke patients.

36  
37  
38 The study showed that the meantime, from the onset of symptoms to hospitalization, was found  
39 to be 23.67 hours. This is in line with other studies conducted by Temesgen *et al.* (23.5 hours)

1  
2  
3 (8) and Fekadu *et al.* (24 hours) (9). Contrary to this finding, it was shorter than the studies  
4 conducted by Sagui, *et al.* (48 hours) (58) and Gebreyohannes, *et al.* (69.42 hours) (50), whereas  
5 it was delayed compared to other studies conducted by He Q *et al.* (8 hours) (52) and de  
6 Carvalho *et al.* (12.9 hours) (51). The difference might be due to the availability of transportation  
7 and nearby health facilities and knowledge of the patient for the clinical presentations of stroke.  
8 Patients who were delayed to come to the hospital had a poor treatment outcome compared to  
9 their counterparts. This finding is inconsistent with previous studies in Africa (22, 35, 59). It is  
10 advisable that hospital arrival within 3 hours of symptom onset to receive thrombolytic  
11 medications such as tissue plasminogen activator, to prevent disabilities and mortality from  
12 stroke (30). Delayed hospital admission creates difficulties in managing stroke and preventing  
13 complications in developing countries, including Ethiopia since early hours are crucial to  
14 delaying poor prognosis. Due to this reason, the majority of stroke patients in this study were not  
15 candidates for tissue plasminogen activators. Moreover, patients diagnosed with hemorrhagic  
16 stroke (AOR=2,68, 95% CI: 1,62-4,43,  $p<0,001$ ) were found to have poor treatment outcome  
17 relative to ischemic stroke. This is in line with study done in Ethiopia and other African  
18 countries, which revealed hemorrhagic stroke was significantly more lethal than ischemic stroke  
19 (19, 34, 38, 60, 61).  
20  
21  
22  
23  
24  
25  
26  
27  
28  
29  
30  
31

32 Even though the presence of co-morbid conditions and development of complications were  
33 found to be significantly associated with poor treatment outcome in different studies (9) , it was  
34 not significantly associated with our finding. The difference could be attributed to the difference  
35 in sample size, the design of the study, and the sampling technique used to predict a significant  
36 association between poor treatment outcomes and contributing factors.  
37  
38  
39  
40  
41  
42

### 43 **5. Limitation of the study**

44  
45 As this study was based on a retrospective chart review, the data obtained might be affected by  
46 the documentation culture of the hospital and the health care providers. Besides, a significant  
47 number of patients discharged against medical advice, some stroke victims may die before  
48 reaching the hospital, and the study was done in a single setting, which may affect the  
49 generalizability of the data to the entire population. Therefore, a prospective study in a  
50 multicenter setting would be better to accurately describe the clinical pattern and treatment  
51 outcome of stroke in Ethiopia.  
52  
53  
54  
55  
56  
57

## 6. Conclusion

Approximately half of the stroke patients had poor treatment outcomes. The most prevalently observed form of stroke in the study setting was ischemic stroke. Moreover, more than half of patients with stroke were suffering from co-morbid hypertension. During hospitalization, acetylsalicylic acid, and atorvastatin combination regimens were commonly used in stroke treatment. Further, education status, types of stroke, and the meantime from the onset of symptoms to admission were the predictors of treatment outcome. Therefore, early identification of stroke types and increasing patient awareness about stroke symptoms to lessen the delay of hospitalization beyond 24 hours are essential strategies to overcome stroke complications and mortality.

### Abbreviations

FHSCH Felege Hiwot Specialized Comprehensive Hospital

RR Rate ratio

WHO World health organization

SPSS Statistical Package for the social sciences

AHA American heart association

### Declarations

#### Ethical approval and consent to participate

Approval and permission were sought from Ethical Board of Debre Tabor University, College of Health Sciences.

#### Consent for Publication

Not applicable

#### Availability of data and materials

The datasets used and/or analyzed during the current study are available from the corresponding author on reasonable request.

#### Competing interests

The authors have declared that no competing interests exist.

### Author's contribution

BK contributes in developing idea, design of the study, statistical analysis and interpretation of the data and write up the proposal and manuscript. AE and MM were involved in proposal development, design of the study, and manuscript writing. AD and GTT contributed to the design of the study and edition of the manuscript. All authors approved the submitted version of the manuscript critically.

### Funding

The author(s) received no financial support for the research, authorship, and/or publication of this article.

### Acknowledgements

We would like to acknowledge FHSC medical ward staffs and data abstractors for their valuable contribution towards this project.

### References

1. Group GBoDSE. Global, regional, and country-specific lifetime risks of stroke, 1990 and 2016. *New England Journal of Medicine*. 2018;379(25):2429-37.
2. Feigin VL, Norrving B, Mensah GA. Global burden of stroke. *Circulation research*. 2017;120(3):439-48.
3. Sacco RL, Kasner SE, Broderick JP, Caplan LR, Connors J, Culebras A, *et al*. An updated definition of stroke for the 21st century: a statement for healthcare professionals from the American Heart Association/American Stroke Association. *Stroke*. 2013;44(7):2064-89.
4. Feigin VL, Krishnamurthi R, Bhattacharjee R, Parmar P, Theadom A, Hussein T, *et al*. New strategy to reduce the global burden of stroke. *Stroke*. 2015;46(6):1740-7.
5. Fekadu G, Chelkeba L, Kebede A. Burden, clinical outcomes and predictors of time to in hospital mortality among adult patients admitted to stroke unit of Jimma university medical center: a prospective cohort study. *BMC neurology*. 2019;19(1):213.
6. Mulat B, Mohammed J, Yeseni M, Alamirew M, Dermello M, Asemahagn MA. Magnitude of stroke and associated factors among patients who attended the medical ward of



- 1  
2  
3 Felege Hiwot Referral Hospital, Bahir Dar town, Northwest Ethiopia. *Ethiopian Journal of*  
4 *Health Development*. 2016;30(3):129-34.
- 5  
6  
7 7. Godoy DA, Piñero GR, Koller P, Masotti L, Di Napoli M. Steps to consider in the  
8 approach and management of critically ill patient with spontaneous intracerebral hemorrhage.  
9 *World journal of critical care medicine*. 2015;4(3):213.
- 10  
11  
12 8. Temesgen TG, Teshome B, Njogu P. Treatment outcomes and associated factors among  
13 hospitalized stroke patients at Shashemene Referral Hospital, Ethiopia. *Stroke research and*  
14 *treatment*. 2018;2018.
- 15  
16  
17 9. Fekadu G, Adola B, Mosisa G, Shibiru T, Chelkeba L. Clinical characteristics and  
18 treatment outcomes among stroke patients hospitalized to Nekemte referral hospital, western  
19 Ethiopia. *Journal of Clinical Neuroscience*. 2020;71:170-6.
- 20  
21  
22 10. Berkowitz AL. Stroke and the noncommunicable diseases: A global burden in need of  
23 global advocacy. *Neurology*. 2015;84(21):2183-4.
- 24  
25  
26 11. Chen X, Zhou L, Zhang Y, Yi D, Liu L, Rao W, et al. Risk factors of stroke in Western  
27 and Asian countries: a systematic review and meta-analysis of prospective cohort studies. *BMC*  
28 *public health*. 2014;14(1):776.
- 29  
30  
31 12. Katan M, Luft A, editors. Global burden of stroke. Seminars in neurology; 2018: Thieme  
32 Medical Publishers.
- 33  
34  
35 13. Feigin VL, Roth GA, Naghavi M, Parmar P, Krishnamurthi R, Chugh S, et al. Global  
36 burden of stroke and risk factors in 188 countries, during 1990–2013: a systematic analysis for  
37 the Global Burden of Disease Study 2013. *The Lancet Neurology*. 2016;15(9):913-24.
- 38  
39  
40 14. Murray CJ, Vos T, Lozano R, Naghavi M, Flaxman AD, Michaud C, et al. Disability-  
41 adjusted life years (DALYs) for 291 diseases and injuries in 21 regions, 1990–2010: a systematic  
42 analysis for the Global Burden of Disease Study 2010. *The lancet*. 2012;380(9859):2197-223.
- 43  
44  
45 15. Feigin VL, Lawes CM, Bennett DA, Anderson CS. Stroke epidemiology: a review of  
46 population-based studies of incidence, prevalence, and case-fatality in the late 20th century. *The*  
47 *Lancet Neurology*. 2003;2(1):43-53.
- 48  
49  
50 16. Abbasi V, Amani F, Aslanian R, Hoseinkhani A, Zakeri A, Masoumi R. Epidemiological  
51 Study of Stroke in Ardabil, Iran: a Hospital Based-Study. *J Neurol Disord Stroke*.  
52 2017;5(3):1128.
- 53  
54  
55  
56  
57  
58  
59  
60

17. Mozaffarian D, Benjamin E, Go A, Arnett D, Blaha M, Cushman M, et al. Heart disease and stroke statistics-2016 update: a report from the American Heart Association. *Circulation*. 2016;133(4):e38.
18. Garbusinski JM, van der Sande MA, Bartholome EJ, Dramaix MI, Gaye A, Coleman R, et al. Stroke presentation and outcome in developing countries: a prospective study in the Gambia. *Stroke*. 2005;36(7):1388-93.
19. Jowi J, Mativo P. Pathological sub-types, risk factors and outcome of stroke at the Nairobi hospital, Kenya. *East African medical journal*. 2008;85(12).
20. Owolabi MO, Arulogun O, Melikam S, Adeoye AM, Akarolo-Anthony S, Akinyemi R, et al. The burden of stroke in Africa: a glance at the present and a glimpse into the future. *Cardiovascular journal of Africa*. 2015;26(2 H3Africa Suppl):S27.
21. Al Khathaami AM, Al Bdah B, Alnosair A, Alturki A, Alrebdi R, Alwayili S, et al. Characteristics and Outcomes of Younger Adults with Embolic Stroke of Undetermined Source (ESUS): A Retrospective Study. *Stroke Research and Treatment*. 2019;2019.
22. Gebremariam SA, Yang HS. Types, risk profiles, and outcomes of stroke patients in a tertiary teaching hospital in northern Ethiopia. *eNeurologicalSci*. 2016;3:41-7.
23. Karthik L, Kumar G, Keswani T, Bhattacharyya A, Chandar SS, Rao KB. Protease inhibitors from marine actinobacteria as a potential source for antimalarial compound. *PloS one*. 2014;9(3).
24. Connor M, Thorogood M, Casserly B, Dobson C, Warlow C. Prevalence of stroke survivors in rural South Africa: results from the Southern Africa Stroke Prevention Initiative (SASPI) Agincourt field site. *Stroke*. 2004;35(3):627-32.
25. Bazaldua OV, Davidson DA, Kripalani S. eChapter 1. Health Literacy and Medication Use. In: DiPiro JT, Talbert RL, Yee GC, Matzke GR, Wells BG, Posey LM, editors. *Pharmacotherapy: A Pathophysiologic Approach*, 9e. New York, NY: *The McGraw-Hill Companies*; 2014.
26. Collaborators GLRoS. Global, regional, and country-specific lifetime risks of stroke, 1990 and 2016. *New England Journal of Medicine*. 2018;379(25):2429-37.
27. Zenebe G, Alemayehu M, Asmera J. Characteristics and outcomes of stroke at Tikur Anbessa Teaching Hospital, Ethiopia. *Ethiopian medical journal*. 2005;43(4):251-9.



- 1
  - 2
  - 3
  - 4
  - 5
  - 6
  - 7
  - 8
  - 9
  - 10
  - 11
  - 12
  - 13
  - 14
  - 15
  - 16
  - 17
  - 18
  - 19
  - 20
  - 21
  - 22
  - 23
  - 24
  - 25
  - 26
  - 27
  - 28
  - 29
  - 30
  - 31
  - 32
  - 33
  - 34
  - 35
  - 36
  - 37
  - 38
  - 39
  - 40
  - 41
  - 42
  - 43
  - 44
  - 45
  - 46
  - 47
  - 48
  - 49
  - 50
  - 51
  - 52
  - 53
  - 54
  - 55
  - 56
  - 57
  - 58
  - 59
  - 60
28. Girum T, Mesfin D, Bedewi J, Shewangizaw M. The Burden of Noncommunicable Diseases in Ethiopia, 2000–2016: Analysis of Evidence from Global Burden of Disease Study 2016 and Global Health Estimates 2016. *International Journal of Chronic Diseases*. 2020;2020.
29. Alemayehu B, Oli K. Stroke admission to Tikur Anbassa Teaching Hospital: with emphasis on stroke in the young. *Ethiopian Journal of Health Development*. 2002;16(3):309-15.
30. Powers WJ, Derdeyn CP, Biller J, Coffey CS, Hoh BL, Jauch EC, et al. 2015 American Heart Association/American Stroke Association focused update of the 2013 guidelines for the early management of patients with acute ischemic stroke regarding endovascular treatment: a guideline for healthcare professionals from the American Heart Association/American Stroke Association. *Stroke*. 2015;46(10):3020-35.
31. Chang T, Gajasinghe S, Arambepola C. Prevalence of stroke and its risk factors in urban Sri Lanka: population-based study. *Stroke*. 2015;46(10):2965-8.
32. Chhabra M, Sharma A, Ajay KR, Rathore MS. Assessment of risk factors, cost of treatment, and therapy outcome in stroke patients: evidence from cross-sectional study. *Expert review of pharmacoeconomics & outcomes research*. 2019;19(5):575-80.
33. Desita ZT, Zewdu WM. CT scan patterns of stroke at the University of Gondar Hospital, North West Ethiopia. *Journal of Advances in Medicine and Medical Research*. 2015:882-8.
34. Alkali NH, Bwala SA, Akano AO, Osi-Ogbu O, Alabi P, Ayeni OA. Stroke risk factors, subtypes, and 30-day case fatality in Abuja, Nigeria. *Nigerian medical journal: journal of the Nigeria Medical Association*. 2013;54(2):129.
35. Komolafe MA, Komolafe EO, Fatoye F, Asaleye C, Famurewa O, Mosaku S, et al. Profile of stroke in Nigerians: a prospective clinical study. 2007.
36. Atadzhanov M, N Mukomena P, Lakhi S, A Ross O, F Meschia J. Stroke characteristics and outcomes of adult patients admitted to the University Teaching Hospital, Lusaka, Zambia. *The Open General and Internal Medicine Journal*. 2012;5(1).
37. Patne SV, Chintale KN. Study of clinical profile of stroke patients in rural tertiary health care Centre. *Int J Adv Med*. 2016;3(3):666-70.
38. Greffie ES, Mitiku T, Getahun S. Risk factors, clinical pattern and outcome of stroke in a referral hospital, Northwest Ethiopia. *Clin Med Res*. 2015;4(6):182-8.

- 1  
2  
3 39. Zhang F-L, Guo Z-N, Wu Y-H, Liu H-Y, Luo Y, Sun M-S, et al. Prevalence of stroke  
4 and associated risk factors: a population based cross sectional study from northeast China. *BMJ*  
5 *open*. 2017;7(9):e015758.  
6  
7  
8 40. Gedefa B, Menna T, Berhe T, Abera H. Assessment of risk factors and treatment  
9 outcome of stroke admissions at St. Paul's teaching hospital, Addis Ababa, Ethiopia. *Journal of*  
10 *Neurology & Neurophysiology*. 2017;8(3):1-6.  
11  
12 41. Beyene HADT. A Two Year Retrospective Cross-Sectional Study on Prevalence,  
13 associated Factors and Treatment outcome among Patients admitted to Medical Ward (Stroke  
14 Unit) at Jimma University Medical Center, Jimma, South West, Ethiopia, 2018. 2018.  
15  
16 42. Nkusi AE, Muneza S, Nshuti S, Hakizimana D, Munyemana P, Nkeshimana M, et al.  
17 Stroke burden in Rwanda: A multicenter study of stroke management and outcome. *World*  
18 *neurosurgery*. 2017;106:462-9.  
19  
20 43. Kassaw A. Prevalence, nursing managements and patients" outcomes among stroke  
21 patients admitted to Tikur Anbessa specialized hospital, Addis Ababa, Ethiopia, 2018: Addis  
22 Ababa Universty; 2018.  
23  
24 44. Walker RW, Rolfe M, Kelly PJ, George MO, James OF. Mortality and recovery after  
25 stroke in the Gambia. *Stroke*. 2003;34(7):1604-9.  
26  
27 45. Rymer MM. Hemorrhagic stroke: intracerebral hemorrhage. *Mo Med*. 2011;108(1):50-4.  
28  
29 46. Masood CT, Hussain M, Abbasi S. Clinical presentation, risk factors and outcome of  
30 stroke at a district level teaching hospital. *Journal of Ayub Medical College Abbottabad*.  
31 2013;25(1-2):49-51.  
32  
33 47. Lawes CM, Bennett DA, Feigin VL, Rodgers A. Blood pressure and stroke: an overview  
34 of published reviews. *Stroke*. 2004;35(3):776-85.  
35  
36 48. Elliott WJ. Systemic hypertension. Current problems in cardiology. 2007;32(4):201-59.  
37  
38 49. Beckett NS, Peters R, Fletcher AE, Staessen JA, Liu L, Dumitrascu D, et al. Treatment of  
39 hypertension in patients 80 years of age or older. *New England Journal of Medicine*.  
40 2008;358(18):1887-98.  
41  
42 50. Gebreyohannes EA, Bhagavathula AS, Abebe TB, Seid MA, Haile KT. In-hospital  
43 mortality among ischemic stroke patients in Gondar University Hospital: a retrospective cohort  
44 study. *Stroke Research and Treatment*. 2019;2019.  
45  
46  
47  
48  
49  
50  
51  
52  
53  
54  
55  
56  
57  
58  
59  
60

- 1  
2  
3 51. de Carvalho JJF, Alves MB, Viana GÁA, Machado CB, dos Santos BFC, Kanamura AH,  
4 et al. Stroke epidemiology, patterns of management, and outcomes in Fortaleza, Brazil: a  
5 hospital-based multicenter prospective study. *Stroke*. 2011;42(12):3341-6.  
6  
7
- 8 52. He Q, Wu C, Luo H, Wang Z-Y, Ma X-Q, Zhao Y-F, et al. Trends in in-hospital  
9 mortality among patients with stroke in China. *PLoS one*. 2014;9(3).  
10
- 11 53. Tirschwell DL, Ton TG, Ly KA, Van Ngo Q, Vo TT, Pham CH, et al. A prospective  
12 cohort study of stroke characteristics, care, and mortality in a hospital stroke registry in Vietnam.  
13 *BMC neurology*. 2012;12(1):150.  
14
- 15 54. Bernheisel CR, Schlaudecker JD, Leopold K. Subacute management of ischemic stroke.  
16 *American family physician*. 2011;84(12).  
17
- 18 55. Adams H, Adams R, Del Zoppo G, Goldstein LB. Guidelines for the early management  
19 of patients with ischemic stroke: 2005 guidelines update a scientific statement from the Stroke  
20 Council of the American Heart Association/American Stroke Association. *Stroke*.  
21 2005;36(4):916-23.  
22
- 23 56. Wang X, Arima H, Yang J, Zhang S, Wu G, Woodward M, et al. Mannitol and outcome  
24 in intracerebral hemorrhage: propensity score and multivariable intensive blood pressure  
25 reduction in acute cerebral hemorrhage trial 2 results. *Stroke*. 2015;46(10):2762-7.  
26
- 27 57. Aminmansour B, Tabesh H, Rezvani M, Poorjafari H. Effects of Mannitol 20% on  
28 Outcomes in Nontraumatic Intracerebral Hemorrhage. *Adv Biomed Res*. 2017;6:75-  
29
- 30 58. Sagui E, M'Baye PS, Dubecq C, Ba Fall K, Niang A, Gning S, et al. Ischemic and  
31 hemorrhagic strokes in Dakar, Senegal: a hospital-based study. *Stroke*. 2005;36(9):1844-7.  
32
- 33 59. Alemayehu CM, Birhanesilasie SK. Assessment of stroke patients: occurrence of  
34 unusually high number of haemorrhagic stroke cases in Tikur Anbessa Specialized Hospital,  
35 Addis Ababa, Ethiopia. *Clin Med Res*. 2013;2(5):94-100.  
36
- 37 60. Connor MD, Walker R, Modi G, Warlow CP. Burden of stroke in black populations in  
38 sub-Saharan Africa. *The Lancet Neurology*. 2007;6(3):269-78.  
39
- 40 61. Asefa G, Meseret S. CT and clinical correlation of stroke diagnosis, pattern and clinical  
41 outcome among stroke patients visiting Tikur Anbessa Hospital. *Ethiopian medical journal*.  
42 2010;48(2):117-22.  
43  
44  
45  
46  
47  
48  
49  
50  
51  
52  
53  
54  
55  
56  
57

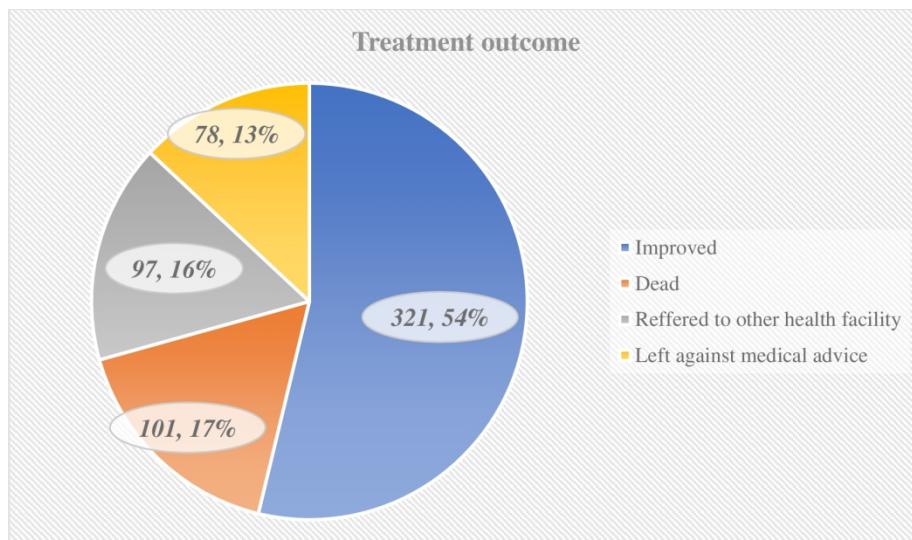

Figure 1: Distribution of stroke patients by their outcomes.

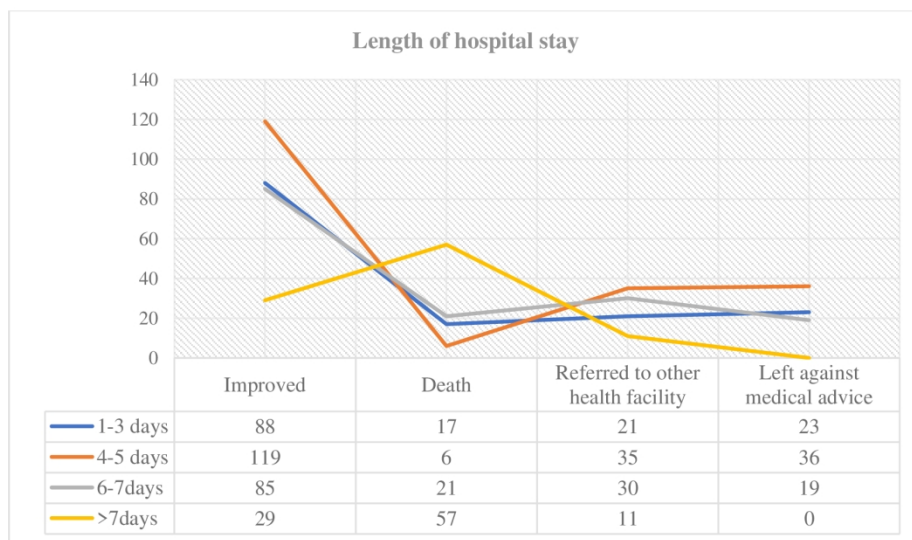

Figure 2: Distribution of patient outcomes by duration of hospital stay

152x199mm (300 x 300 DPI)

# BMJ Open

## Clinical pattern and predictors of stroke treatment outcome among hospitalized stroke patients at Felege Hiwot Comprehensive Specialized Hospital, North-west Ethiopia: A retrospective cross-sectional study

|                                 |                                                                                                                                                                                                                                                                                                                                                                                                                                                                                                                                                                                              |
|---------------------------------|----------------------------------------------------------------------------------------------------------------------------------------------------------------------------------------------------------------------------------------------------------------------------------------------------------------------------------------------------------------------------------------------------------------------------------------------------------------------------------------------------------------------------------------------------------------------------------------------|
| Journal:                        | <i>BMJ Open</i>                                                                                                                                                                                                                                                                                                                                                                                                                                                                                                                                                                              |
| Manuscript ID                   | bmjopen-2020-040238.R1                                                                                                                                                                                                                                                                                                                                                                                                                                                                                                                                                                       |
| Article Type:                   | Original research                                                                                                                                                                                                                                                                                                                                                                                                                                                                                                                                                                            |
| Date Submitted by the Author:   | 23-Nov-2020                                                                                                                                                                                                                                                                                                                                                                                                                                                                                                                                                                                  |
| Complete List of Authors:       | Kefale, Belayneh; Debre Tabor University, Clinical Pharmacy Unit and Research team, Department of Pharmacy, College of Health Sciences Ewunetei, Amien; Debre Tabor University, Pharmacology Unit and Research team, Department of Pharmacy, College of Health Sciences Molla, Mulugeta; Debre Tabor University, Pharmacology Unit and Research team, Department of Pharmacy, College of Health Sciences Tegegne, Gobezie ; Addis Ababa University College of Health Sciences Degu, Amsalu; United States International University-Africa, Department of Pharmaceutics and Pharmacy Practice |
| <b>Primary Subject Heading</b>: | Neurology                                                                                                                                                                                                                                                                                                                                                                                                                                                                                                                                                                                    |
| Secondary Subject Heading:      | Neurology, Rehabilitation medicine, Pharmacology and therapeutics, Palliative care                                                                                                                                                                                                                                                                                                                                                                                                                                                                                                           |
| Keywords:                       | NEUROLOGY, Stroke < NEUROLOGY, Stroke medicine < INTERNAL MEDICINE                                                                                                                                                                                                                                                                                                                                                                                                                                                                                                                           |
|                                 |                                                                                                                                                                                                                                                                                                                                                                                                                                                                                                                                                                                              |

SCHOLARONE™  
Manuscripts

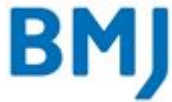

I, the Submitting Author has the right to grant and does grant on behalf of all authors of the Work (as defined in the below author licence), an exclusive licence and/or a non-exclusive licence for contributions from authors who are: i) UK Crown employees; ii) where BMJ has agreed a CC-BY licence shall apply, and/or iii) in accordance with the terms applicable for US Federal Government officers or employees acting as part of their official duties; on a worldwide, perpetual, irrevocable, royalty-free basis to BMJ Publishing Group Ltd ("BMJ") its licensees and where the relevant Journal is co-owned by BMJ to the co-owners of the Journal, to publish the Work in this journal and any other BMJ products and to exploit all rights, as set out in our [licence](#).

The Submitting Author accepts and understands that any supply made under these terms is made by BMJ to the Submitting Author unless you are acting as an employee on behalf of your employer or a postgraduate student of an affiliated institution which is paying any applicable article publishing charge ("APC") for Open Access articles. Where the Submitting Author wishes to make the Work available on an Open Access basis (and intends to pay the relevant APC), the terms of reuse of such Open Access shall be governed by a Creative Commons licence – details of these licences and which [Creative Commons](#) licence will apply to this Work are set out in our licence referred to above.

Other than as permitted in any relevant BMJ Author's Self Archiving Policies, I confirm this Work has not been accepted for publication elsewhere, is not being considered for publication elsewhere and does not duplicate material already published. I confirm all authors consent to publication of this Work and authorise the granting of this licence.

1  
2  
3 **Clinical pattern and predictors of stroke treatment outcome among hospitalized stroke**  
4 **patients at Felege Hiwot Comprehensive Specialized Hospital, North-west Ethiopia: A**  
5 **retrospective cross-sectional study**  
6  
7

8  
9 Belayneh Kefale<sup>1\*</sup>, Amien Ewunetei<sup>2</sup>, Mulugeta Molla<sup>2</sup>, Gobezie Temesgen Tegegne<sup>3</sup>, Amsalu  
10 Degu<sup>4</sup>  
11

12  
13 <sup>1</sup>Clinical Pharmacy Unit and Research team, Department of Pharmacy, College of Health Sciences, Debre Tabor  
14 University, PO Box 272, Debre Tabor, Amhara, Ethiopia

15 <sup>2</sup>Pharmacology Unit and Research team, Department of Pharmacy, College of Health Sciences, Debre Tabor  
16 University, PO Box 272, Debre Tabor, Amhara, Ethiopia

17 <sup>3</sup>Department of Pharmacology and Clinical Pharmacy, School of Pharmacy, College of Health Sciences, Addis Ababa  
18 University, Addis Ababa, Ethiopia.

19 <sup>4</sup>Department of Pharmaceutics and Pharmacy Practice, School of Pharmacy and Health Sciences, United States  
20 International University-Africa, P.O. Box 14634 - 00800, Nairobi, Kenya

21  
22 **\*Correspondence author at:** Clinical Pharmacy Unit and Research team, Department of Pharmacy,  
23 College of Health Sciences, Debre Tabor University, PO Box 272, Debre Tabor, Amhara, Ethiopia

24 Tel. +251913805289/90; E-mail address: [bkefale5@gmail.com](mailto:bkefale5@gmail.com) or [bkefale5@dtu.edu.et](mailto:bkefale5@dtu.edu.et) (Belayneh Kefale)

25 ORCID ID: <https://orcid.org/0000-0003-4841-0861>  
26

27  
28 **Abstract**  
29

30  
31 **Objectives:** This study aimed to assess the clinical pattern and predictors of stroke treatment  
32 outcomes among hospitalized patients in Felege Hiwot comprehensive specialized hospital  
33 (FHCSH) in northwest Ethiopia.  
34

35  
36 **Design:** A retrospective cross-sectional study  
37

38  
39 **Setting:** The study was conducted medical ward of FHCSH.  
40

41  
42 **Participants:** The medical records of 597 adult stroke patients were included in the study. All  
43 adult ( $\geq 18$  years) stroke patients who had been admitted to the medical ward of FHSCS during  
44 2015-2019 were included in the study. However, patients with incomplete medical records (i.e.,  
45 incomplete treatment regimen and the status of the patients after treatment) were excluded in the  
46 study.  
47  
48  
49  
50  
51  
52  
53  
54  
55  
56  
57  
58  
59  
60



1  
2  
3 **Results:** In the present study, 317 (53.1%) were males, and the mean age of the study participants  
4 was 61.08 ± 13.76. About two-thirds of patients (392, 65.7%) were diagnosed with ischemic  
5 stroke. Regarding clinical pattern, about 203 (34.0%) of patients complained of right-side body  
6 weakness, and the major comorbid condition identified was hypertension (216, 64.9%). Overall,  
7 276 (46.2%) of them had poor treatment outcomes, and 101 (16.9%) of them died. Patients who  
8 cannot read and write (AOR=42.89, 95% CI: 13.23-111.28, p<0.001), attend primary school  
9 (AOR=22.11, 95% CI: 6.98-55.99, p<0.001) and secondary school (AOR=4.20, 95% CI: 1.42-  
10 12.51, p<0.001), diagnosed with hemorrhagic stroke (AOR=2.68, 95% CI: 1.62-4.43, p<0.001)  
11 and delayed hospital arrival more than 24 hours (AOR= 2.92, 95% CI: 1.83-4.66, p=0.001) were  
12 the independent predictors of poor treatment outcome.  
13  
14  
15  
16  
17  
18  
19  
20

21 **Conclusions:** Approximately half of the stroke patients had poor treatment outcomes. Ischemic  
22 stroke was the most predominantly diagnosed stroke type. Education status, types of stroke, and  
23 the median time from onset of symptoms to hospitalization were the predictors of treatment  
24 outcome. Health education should be given to patients regarding clinical symptoms of stroke. In  
25 addition, local healthcare providers need to consider the above risk factors while managing stroke.  
26  
27  
28  
29  
30

### 31 **Strengths and limitations of this study**

- 32
- 33 • This study has provided a real insight into the current treatment outcome and clinical pattern  
34 among hospitalized stroke patients in northwest Ethiopia.
- 35
- 36 • The study was conducted with a larger sample size, which can enhance the generalizability of  
37 the findings.
- 38
- 39 • Due to the retrospective nature, the data obtained might be affected by the documentation  
40 culture of the hospital and the health care providers.
- 41
- 42 • The study was done in a single setting, which may affect the generalizability of the data to the  
43 entire population.
- 44
- 45 • A prospective study in a multicenter setting would be better to accurately describe the clinical  
46 pattern and treatment outcome of stroke in Ethiopia.  
47  
48  
49  
50  
51  
52  
53  
54  
55  
56  
57  
58  
59  
60



## Introduction

Stroke is one of the most common causes of morbidity and mortality in developing and developed countries in the 21<sup>st</sup> century. Despite geographical variation in the lifetime risk of stroke, one in four persons whose age is 25 years and above develops stroke during their lifetime (1). Currently, central nervous system infarction is defined as the brain, spinal cord, or retinal cell death attributable to ischemia in a specified vascular territory, based on neuropathological, neuroimaging, and clinical evidence of ischemic injury with symptoms persisting lasting 24 hours or longer after exclusion of other etiologies (2, 3). It is associated with severe medical conditions with high complications caused by reduced blood flow to the brain (4, 5). According to the 2016 report of the World Health Organization (WHO) and The Global Burden of Diseases, Injuries, and Risk Factors Study (GBD), there were 33 million people with stroke with an incidence of 15 million and 5 million stroke deaths and 116.4 million disability-adjusted life-years (6, 7). The stroke burden will be doubled if the trend continues by the year 2030 (8). According to the American Heart Association (AHA) report, stroke can be classified into either ischemic due to blood clot in the artery that supplies the brain or hemorrhagic due to intracranial bleeding (9, 10). Various studies showed that ischemic stroke (52.5% - 87%) is the most frequently diagnosed type of stroke compared to hemorrhagic stroke (11, 12). Ischemic stroke is significantly less fatal than a hemorrhagic type of stroke, with 30-day case-fatality rates of 46.5% for hemorrhagic stroke compared to 9% to 23% in ischemic stroke (10). Worldwide, it is the second leading cause of mortality, accounting for 10% of all deaths, and killing 5.5million people each year (4, 13, 14). In western countries, stroke is the third most common cause of morbidity and mortality next to cancer and coronary artery disease, with mortality rates of 17% - 34% in the first month of post-stroke days and 25% - 40% in the first 12 months (15, 16). Despite a 35% reduction in stroke mortality between 2001 and 2011, a stroke occurred in the United States at a rate of almost 800,000 per year and resulted in 128,932 deaths in 2011 (17). In developing countries, the incidence of stroke is rapidly increasing due to the high prevalence of hypertension, diabetes, obesity, smoking, and other non-communicable diseases (9, 18, 19), and 86% of all stroke associated deaths globally were occurred in low and middle-income countries (20). In Africa, the incidence of stroke-related morbidity and mortality is increasing due to the high prevalence of various risk factors such as hypertension, diabetes mellitus, smoking, older age, and alcohol (4, 16, 21-24).

1  
2  
3 A recent community survey undertaken in African countries showed stroke prevalence was  
4 between 200 and 300 per 100,000 populations (25), and its prevalence is increasing compared to  
5 the previous African stroke report (58–68 per 100,000) (26). In sub-Sahara African countries, the  
6 estimated lifetime risk of developing stroke was 11.8% (27). Further, despite comprehensive data  
7 regarding stroke burden in Ethiopia are scarce, observational studies showed that it is one of the  
8 commonest reasons for hospital admission (11, 28), and its incidence is increasing annually (29).  
9 As per the WHO stroke mortality report, stroke mortality was estimated to be 122–153.8 per  
10 100,000 people in Ethiopia (30). Patients usually present late, and the standard of care is poor  
11 compared to developed countries; hence, rate of mortality is expected to be higher. However, data  
12 is scarce on clinical pattern and treatment outcome among stroke patients in North-west Ethiopia.  
13 Therefore, it is imperative that a lot has to be done to address the burden of stroke, risk factors,  
14 and mortality in Ethiopia (5, 24). Hence, the present study was aimed to assess the clinical pattern  
15 and predictors of stroke treatment outcomes among hospitalized stroke patients at the medical  
16 ward of FHSCH.  
17  
18  
19  
20  
21  
22  
23  
24  
25  
26  
27  
28

## 29 **Methods**

### 30 **Study design and period**

31 A retrospective cross-sectional study was conducted at FHSCH, Bahir Dar town, located 665 km  
32 from the North-west of Addis Ababa. The hospital provides different clinical services for 12  
33 million population in the catchment area. It serves as a referral center for surrounding primary and  
34 general hospitals as well as a teaching hospital for Bahir Dar University. The data were collected  
35 from January to February 2020.  
36  
37  
38  
39  
40  
41  
42

### 43 **Eligibility criteria**

44 All adult ( $\geq 18$  years) stroke patients diagnosed to had stroke by Magnetic resonance imaging  
45 (MRI) or clinically and admitted to the medical ward of FHSCH during 2015-2019 were included  
46 in the study. However, patients with incomplete medical records (i.e., incomplete treatment  
47 regimen and treatment outcome) were excluded from the study.  
48  
49  
50  
51  
52  
53  
54  
55  
56  
57

### **Sample size and sampling techniques**

All medical records of adult stroke patients who had been treated at FHSC during 2015-2019 were eligible to the study. Based on the above eligibility criteria, 597 medical records with a confirmed stroke diagnosis (with a MRI or clinically) were included in the study. Since all eligible medical records of stroke patients were involved in the study, a consecutive sampling technique was employed.

### **Data collection instrument and procedure**

Data abstraction format was adapted from various relevant literature and further modified based on the pretest result, undertaken in 5% of hospitalized stroke patients' medical cards. The format contained socio-demographic patient characteristics, clinically related information, previous, current, and discharge medications used, comorbidities, complications, time from onset of symptoms to hospitalization, length of hospital stay, type of stroke, and treatment outcome status. These data were collected from the patients' medical records. Six trained clinical pharmacists participated for the data collection.

### **Study variables**

The treatment outcome was the outcome variable of the study, which could be influenced by the following independent variables. These are: age, sex, occupational status, types of stroke, length of hospital stay, the median time from onset of symptom to hospitalization and comorbidity status were the main independent variables of the study.

### **Data analysis**

The collected data were entered and analyzed using SPSS version 25.0 statistical software. Descriptive statistics such as frequency, percentage, and mean with standard deviations were used to describe the independent variables. Multiple stepwise backward logistic regression analysis was done for a P value of  $< 0.25$  to identify the independent predictors of treatment outcome. Statistical significance was set at  $p < 0.05$ .

### **Patient and public involvement**

Patients were not involved in the design and conduction of this study. In addition, they were not invited to comment on the study design and consulted to develop patient relevant outcomes or

1  
2  
3 interpret the results. Further, they were not invited to contribute to the writing or editing of this  
4 document for readability or accuracy.  
5  
6

### 7 **Operational Definition**

9 **Undetermined type of stroke:** A type of stroke neither ischemic nor hemorrhagic, not clearly  
10 identified.  
11

12 **Improved or good treatment outcome:** If the patient is discharged without complication or if  
13 patient discharge with improvement.  
14

15 **Poor treatment outcome:** If the patient is discharged with complication, or referred to higher  
16 health facility, or left against medical advice or death.  
17  
18  
19  
20

## 21 **Results**

### 22 **Socio-demographic characteristics of patients**

23 In the present study, a total of 597 stroke patients' medical record were reviewed. Males were  
24 accounted for 317 (53.1%). The mean age of the study participants was  $61.08 \pm 13.76$ , with the  
25 age range of 25 - 98 years. Approximately, 252 (42.2%) patients were in the age range of 56–70  
26 years. In addition, 191 (33.0%) and 152 (25.5%) patients attended primary and higher education,  
27 respectively. Regarding occupation, the majority (225, 37.7%) of them were farmers (Table 1).  
28  
29  
30  
31  
32  
33  
34  
35  
36  
37  
38  
39  
40  
41  
42  
43  
44  
45  
46  
47  
48  
49  
50  
51  
52  
53  
54  
55  
56  
57  
58  
59  
60

Table 1: Socio-demographic characteristics of stroke patients hospitalized at Felege Hiwot Comprehensive Specialized Hospital, North west Ethiopia

| Variables                 | Categories          | Frequency (%)   |                    |              |            |
|---------------------------|---------------------|-----------------|--------------------|--------------|------------|
|                           |                     | Ischemic stroke | Hemorrhagic stroke | Undetermined | Total      |
| <b>Sex</b>                | Male                | 217 (55.4)      | 89 (47.3)          | 11 (64.7)    | 317 (53.1) |
|                           | Female              | 175 (44.6)      | 99 (52.7)          | 6 (35.3)     | 280 (46.9) |
| <b>Age</b>                | <40                 | 20 (5.1)        | 27 (14.4)          | 2 (11.8)     | 49 (8.2)   |
|                           | 41-55               | 100 (25.5)      | 44 (23.4)          | 2 (11.8)     | 146 (24.5) |
|                           | 56-70               | 168 (42.9)      | 81(43.1)           | 3 (17.6)     | 252 (42.2) |
|                           | >70                 | 104 (26.5)      | 36 (19.1)          | 10 (58.8)    | 150 (25.1) |
| <b>Occupation</b>         | Farmer              | 150 (38.3)      | 67(35.6)           | 8 (47.1)     | 225 (37.7) |
|                           | Employed            | 76 (19.4)       | 35 (18.6)          | 2 (11.8)     | 113 (18.9) |
|                           | Unemployed          | 34 (8.7)        | 20 (10.6)          | 1 (5.9)      | 55 (9.2)   |
|                           | Housewife           | 85 (21.7)       | 58 (30.9)          | 4 (23.5)     | 147 (24.6) |
|                           | Retired             | 47 (12)         | 8 (4.3)            | 2 (11.8)     | 57 (9.5)   |
| <b>Educational status</b> | Cannot read & write | 93 (23.7)       | 53 (28.2)          | 6 (35.3)     | 152 (25.5) |
|                           | Primary             | 70 (17.9)       | 44 (23.4)          | 3 (17.6)     | 117 (19.6) |
|                           | Secondary           | 92 (23.5)       | 42 (22.3)          | 3 (17.6)     | 137 (22.9) |
| <b>Residence</b>          | Higher education    | 137 (34.9)      | 49 (26.1)          | 5 (29.4)     | 191 (32.0) |
|                           | Urban               | 206 (52.6)      | 65 (34.6)          | 7 (41.2)     | 278 (46.6) |
|                           | Rural               | 186(7.4)        | 123 (5.4)          | 10 (58.8)    | 319 (53.4) |

### Clinical characteristics of stroke patients

About two-thirds of the patients (392, 65.7%) were diagnosed with ischemic stroke, while 188 (31.5%) had a hemorrhagic stroke. The mean time from the onset of symptoms until arrival at the hospital was 23.67 hours. In addition, the median length of hospital stay was  $5.55 \pm 3.29$  days, and more than half of the patients (345, 57.8 %) remained in the hospital for five or fewer days.

Approximately, one-third of stroke patients complained right sided body weakness (203, 34.0 %), followed by left side body weakness (194, 32.5%). Moreover, more than half of them (333, 55.8%) had at least one comorbid condition, of which the most common comorbid conditions was hypertension (219, 64.9%), atrial fibrillation (114, 34.2%), and diabetes mellitus (83, 24.9%).

Hypertension was primarily prevalent in hemorrhagic stroke (158, 84 %) compared with patients with ischemic stroke (175, 44.6%). The most common complications of stroke were aspiration pneumonia (125, 64.4%) and elevated intracranial pressure (57, 29.4%) (Table 2).

Table 2: Clinical characteristics of stroke patients hospitalized at Felege Hiwot Comprehensive Specialized Hospital, North west Ethiopia, 2020.

| Variables                            | Category                  | Frequency (%) |
|--------------------------------------|---------------------------|---------------|
| <b>Clinical presentation</b>         | Right side body weakness  | 203 (34.0)    |
|                                      | Left side body weakness   | 194 (32.5)    |
|                                      | Loss of consciousness     | 103 (17.3)    |
|                                      | Aphasia                   | 97 (16.2)     |
| <b>Types of stroke</b>               | Ischemic stroke           | 392 (65.7)    |
|                                      | Hemorrhagic stroke        | 188 (31.5)    |
|                                      | Undetermined              | 17 (2.8)      |
| <b>Co-morbid status</b>              | Absent                    | 264 (44.2)    |
|                                      | Present                   | 333 (55.8)    |
| <b>Specific co-morbid conditions</b> | Hypertension              | 216 (64.9)    |
|                                      | Atrial fibrillation       | 114 (34.2)    |
|                                      | Diabetes mellitus         | 83 (24.9)     |
|                                      | Congestive heart failure  | 37 (11.1)     |
|                                      | Epilepsy                  | 33 (9.9)      |
|                                      | Hyperlipidemia            | 22 (6.6)      |
|                                      | Others*                   | 31 (9.3)      |
| <b>Complication status</b>           | Absent                    | 403 (67.5)    |
|                                      | Present                   | 194 (32.5)    |
| <b>Specific complications</b>        | Aspiration pneumonia      | 125 (64.4)    |
|                                      | Increased ICP             | 57 (29.4)     |
|                                      | Septic shock              | 29 (14.9)     |
|                                      | Bed sore                  | 23 (11.9)     |
|                                      | Others*                   | 17 (8.8)      |
|                                      | <b>Time from onset to</b> | <12 hours     |

|                                |             |                 |
|--------------------------------|-------------|-----------------|
| <b>hospitalization</b>         | 12-24 hours | 204 (34.2)      |
|                                | 25-48hours  | 130 (21.8)      |
|                                | >48hours    | 146 (24.5)      |
| <b>Length of hospital stay</b> | ≤ 5days     | 345 (57.8)      |
|                                | > 5days     | 252 (42.2)      |
|                                | Mean day    | 5.55 ±3.29 days |

<sup>‡</sup>(Urinary tract infection, HIV/AIDs, lipoma, asthma, glaucoma, breast cancer), <sup>\*</sup>(seizure, acute renal failure, diabetic ketoacidosis, hypokalemia, eclampsia), ICP: intracranial pressure

### Management pattern of stroke patients

About half of patients with stroke (333, 55.8%) had a history of medication. During admission, 12.2% and 9.0% of patients were used enalapril and nifedipine, respectively. In addition, 352 (59%) stroke patients used combinations of acetylsalicylic acid and atorvastatin, while 103 (17.3%) patients received support/physiotherapy during hospitalization. Cimetidine (154, 25.8%) and a combination of metronidazole, ceftriaxone, and cimetidine 110 (18.4%) were the major concomitantly administered medications. Besides, acetylsalicylic acid 321 (53.8%), and acetylsalicylic acid and atorvastatin combination (97, 16.2%) were the frequent discharge medications, while nifedipine (147, 24.6%) was the most commonly concomitantly prescribed drug upon discharge. Further, 227 (38.0%) stroke patients were prescribed non-fractionated heparin for the prevention of deep venous thrombosis during hospitalization (Table 3).

Table 3: Management pattern among stroke patients hospitalized at Felege Hiwot Comprehensive Specialized Hospital, Northwest Ethiopia

| Management practice     | Categories                       | Frequency (N) | Percentage (%) |
|-------------------------|----------------------------------|---------------|----------------|
| Past medication history | Enalapril                        | 73            | 12.2           |
|                         | Oral hypoglycemic                | 45            | 7.5            |
|                         | Nifedipine                       | 54            | 9.0            |
|                         | Hydrochlorothiazide              | 38            | 6.4            |
|                         | Nifedipine + hydrochlorothiazide | 32            | 5.4            |
|                         | Atorvastatin                     | 27            | 4.5            |
|                         | Phenytoin                        | 24            | 4.0            |
|                         | Insulin                          | 15            | 2.5            |

|                         |                                          |     |      |
|-------------------------|------------------------------------------|-----|------|
|                         | Others*                                  | 25  | 4.2  |
|                         | None                                     | 264 | 44.2 |
| Medications used to     | ASA + atorvastatin                       | 352 | 59.0 |
| treat stroke during     | Supportive therapy/physiotherapy         | 103 | 17.3 |
| hospitalization         | ASA                                      | 54  | 9.0  |
|                         | Atorvastatin                             | 52  | 8.7  |
|                         | ASA+ atorvastatin + physiotherapy        | 36  | 6.0  |
| Concomitantly           | Cimetidine                               | 154 | 25.8 |
| administered drugs for  | Ceftriaxone + metronidazole + cimetidine | 110 | 18.4 |
| hospitalized stroke     | Heparin                                  | 71  | 11.9 |
| patients                | Ceftriaxone + metronidazole              | 52  | 8.7  |
|                         | Mannitol                                 | 52  | 8.7  |
|                         | Bisacodyl                                | 43  | 7.2  |
|                         | Metoprolol                               | 34  | 5.7  |
|                         | Warfarin                                 | 30  | 5.0  |
|                         | Mannitol +ranitidine                     | 32  | 5.4  |
|                         | Ceftriaxone + cimetidine                 | 19  | 3.2  |
| Medications give at     | ASA                                      | 321 | 53.8 |
| discharge for treatment | ASA + atorvastatin                       | 97  | 16.2 |
| of stroke               | Atorvastatin                             | 78  | 13.1 |
| Concurrently            | Nifedipine                               | 147 | 24.6 |
| prescribed drug         | Metoprolol                               | 91  | 15.2 |
| prescribed during       | Ranitidine                               | 89  | 14.9 |
| discharge               | Enalapril                                | 82  | 13.7 |
|                         | Omeprazole                               | 41  | 6.9  |
|                         | Phenytoin                                | 28  | 4.7  |
|                         | Digoxin                                  | 18  | 3.0  |

\*(HAART, salbutamol, antibiotics and anticancer), ASA: acetylsalicylic acid (aspirin)



### Treatment outcome and associated factors

As shown in Figure 1, more than half of the stroke patients (321, 53.8%) were discharged with good treatment outcome. Contrastingly, poor treatment outcome was observed in 276 (46.2%) patients. Of patients with poor treatment outcome, 16.9% were died.

Figure 1: Distribution of stroke patients by their outcomes.

More than half (57, 56.4%) of patients who died stayed more than seven days in the hospital. One hundred nineteen (30.1%), 36 (46.2%) and 36 (36.1%) good treatment outcome were left with medical advice and referred to other health facility and stayed 4-5 days in the hospital, respectively (Figure 2).

Figure 2: Distribution of patient outcomes by duration of hospital stay

The present study showed that the majority of patients (63, 62.4%) with a hemorrhagic stroke had fatal outcomes. On the other hand, more patients with ischemic stroke have been improved, referred to other healthcare facilities, and left to medical advice than patients with hemorrhagic stroke (Table 4).

Table 4: Distribution of 'patients' outcomes by stroke types

| Patient outcomes                                        | Types of stroke |                    |              | Total       |
|---------------------------------------------------------|-----------------|--------------------|--------------|-------------|
|                                                         | Ischemic stroke | Hemorrhagic stroke | Undetermined |             |
| Improved                                                | 238 (74.1%)     | 74 (23.1%)         | 9 (3.8%)     | 321 (53.8%) |
| Referred to other health facility                       | 65 (67%)        | 31 (32%)           | 1 (1%)       | 97 (16.2%)  |
| Left against medical advice on self and family requests | 57 (73.1%)      | 20 (25.6%)         | 1 (1.3%)     | 78 (13.1%)  |
| Death                                                   | 32 (31.7%)      | 63 (62.4%)         | 6 (5.9%)     | 101 (16.9%) |
| Total                                                   | 392 (65.7%)     | 188 (31.5%)        | 17 (2.8%)    | 597 (100%)  |

The multivariate logistic regression model showed that educational status, types of stroke, and time from onset of symptoms to hospitalization were significant predictors of stroke treatment outcome.

Accordingly, patients who cannot read and write, attend primary and secondary school were about forty-three (AOR=42.89, 95% CI: 13.23-111.28,  $p<0.001$ ), twenty-two (AOR=22.11, 95% CI: 6.98-55.99,  $p<0.001$ ) and four (AOR=4.20, 95% CI: 1.42-12.51,  $p<0.001$ ) times more likely to have a risk of poor treatment outcome, respectively. Besides, patients diagnosed with a hemorrhagic type of stroke were three (AOR=2.68, 95% CI: 1.62-4.43,  $p<0.001$ ) times more likely to have poor treatment outcomes than ischemic stroke patients. Further, patients with time from symptom onset to hospitalization greater than 24 hours were three (AOR= 2.92, 95% CI: 1.83-4.66,  $p=0.001$ ) times more likely to have poor treatment outcomes as compared to their counterparts (Table 5).

Table 5: Univariate and multivariate binary logistic regression analysis of predictors of treatment outcome

| Variables          | Categories          | Treatment outcome |      | Univariate analysis     | Multivariate analysis  |         |
|--------------------|---------------------|-------------------|------|-------------------------|------------------------|---------|
|                    |                     | Good              | Poor | COR (95% CI)            | AOR (95% CI)           | P-Value |
| Sex                | Male                | 162               | 155  | 1                       | 1                      |         |
|                    | Female              | 159               | 121  | 0.78 (0.58 - 1.01) *    | 0.86 (0.42 - 1.75)     | 0.679   |
| Age                | <40                 | 12                | 37   | 1.73 (0.84 - 3.60) *    | 2.23 (0.79 - 6.31)     | 0.130   |
|                    | 41-55               | 98                | 48   | 0.28 (0.17 - 0.45) *    | 0.53 (0.16 - 0.69)     | 0.071   |
|                    | 57-70               | 157               | 95   | 0.34 (0.22 - 0.52) *    | 0.31 (0.16 - 0.61)     | 0.068   |
|                    | >70                 | 54                | 96   | 1                       | 1                      |         |
| Educational status | Cannot read & write | 30                | 122  | 36.81 (19.81 - 68.42) * | 42.89 (13.23 - 111.28) | <0.001  |
|                    | Primary             | 33                | 84   | 23.04 (12.37 - 42.91) * | 22.11(6.98-55.99)      | <0.001  |
|                    | Secondary           | 86                | 55   | 5.37 (2.99 - 9.66) *    | 4.20 (1.42 - 12.51)    | <0.001  |
|                    | Higher education    | 172               | 19   | 1                       | 1                      |         |
| Occupation         | Farmer              | 82                | 143  | 4.88 (2.55 - 9.35) *    | 0.52 (0.14 - 1.94)     | 0.330   |
|                    | Employed            | 102               | 11   | 0.30 (0.13 - 0.71) *    | 0.85 (0.27 - 2.72)     | 0.789   |

|                                                      |                    |     |     |                      |                    |        |
|------------------------------------------------------|--------------------|-----|-----|----------------------|--------------------|--------|
|                                                      | Unemployed         | 30  | 25  | 2.33 (1.06 - 5.16) * | 0.56 (0.14 - 2.28) | 0.417  |
|                                                      | House wife         | 65  | 82  | 3.53 (1.80 - 6.93) * | 0.55 (0.14 - 2.06) | 0.362  |
|                                                      | Retired            | 42  | 15  | 1                    | 1                  |        |
| <b>Types of stroke</b>                               | Ischemic stroke    | 238 | 154 | 1                    | 1                  |        |
|                                                      | Hemorrhagic stroke | 74  | 114 | 2.38 (1.67 - 3.40) * | 2.68 (1.62 - 4.43) | <0.001 |
|                                                      | Undetermined       | 9   | 8   | 1.37 (0.52 - 3.64)   | 0.35 (0.09 - 1.43) | 0.143  |
| <b>Length of hospital stay</b>                       | ≤ 5days            | 207 | 138 | 1                    | 1                  |        |
|                                                      | > 5days            | 114 | 138 | 1.82 (1.31 - 2.52) * | 1.70 (1.04 - 2.79) | 0.056  |
| Median time from onset of symptom to hospitalization | ≤24hrs             | 207 | 114 | 1                    | 1                  |        |
|                                                      | >24hr              | 114 | 162 | 2.58 (1.85 - 3.59) * | 2.92 (1.83 - 4.66) | 0.001  |
| <b>Comorbidity status</b>                            | Absence            | 166 | 178 | 1                    | 1                  |        |
|                                                      | Present            | 155 | 175 | 1.95 (1.40 - 2.71) * | 1.38 (0.85 - 2.22) | 0.192  |

AOR: Adjusted Odds ratio; COR: Crudes Odds ratio; CI: Confidence interval.

\*Shows statistically significant at p-value < 0.25 during univariate analysis.

## Discussion

A five-year retrospective cross-sectional study was conducted to describe the clinical patterns and treatment outcome of patients with stroke admitted to the medical ward of FHSC. The mean age of patients in this study was 63.2±12.6 years, which is consistent with other previous hospital-based studies in Ethiopia where the mean age of stroke patients ranged from 56-66 years (11, 12, 22). The existence of multiple comorbidities such as hypertension, heart disease, and diabetes may be due to the high prevalence of stroke in the elderly. This is, however, lower than studies carried out in Iran (16) and USA (31) and higher than other studies conducted in Ethiopia (28, 30, 32), Sri Lanka (32), and India (33). This disparity may be due to differences in socio-demographic factors, sample size, and the method used in the studies. The prevalence of stroke in males was significantly higher than in females that are consistent with other cross-sectional studies in Ethiopia (12, 22, 34), Nigeria (35, 36), Kenya (19), Zambia (37), India(33, 38), Iran (16) and Sri Lanka (32). The high prevalence of stroke in males may be attributed to the increased habit of

1  
2  
3 drinking alcohol and smoking cigarettes. Other studies performed by Greffie *et al.* and Connor *et*  
4 *al.* (25, 39) showed that stroke is mainly diagnosed in females. This might be explained by the  
5 presence of different risk factors such as pregnancy-related disorders and the frequent use of  
6 contraceptives in females in those studies.  
7  
8  
9

10  
11 The finding of this study also revealed that ischemic stroke was predominant (65.7%). Previously  
12 related research found more prevalence of ischemic stroke as opposed to hemorrhagic stroke (9,  
13 11, 22, 32, 39, 40). Contrastingly, hemorrhagic stroke was predominant in studies conducted at St.  
14 Paul's Teaching Hospital (61.3%) (41), Jimma (64.3%) (42), and Rwanda (65%) (43). This  
15 disparity could probably due to the difference in pattern of cardiovascular risk factors, and co-  
16 morbidities, especially cardiovascular risk factors in St. Paul's Teaching Hospital, Jimma, and  
17 Rwanda. Moreover, 55.8% of the study participants had one or more comorbid conditions, of  
18 which, hypertension was the most prevalent comorbid disease. This is consistent with other studies  
19 in Ethiopia (24, 41, 44), Tanzania, and Sri Lanka (32, 45), which reported that hypertension was  
20 the most common comorbid condition in patients with stroke. Furthermore, research performed by  
21 Fekadu *et al.* (12), Gebremariam & Yang (22), and Rymer (46), showed that high blood pressure  
22 and aging blood vessels constituted a major risk factor for stroke development. The likely  
23 explanation for the high prevalence of hypertension could be poor lifestyle & public awareness  
24 and inaccessible health facilities in developing countries. This study showed that almost one-third  
25 of the stroke patients complained right-sided body weakness. Previous studies in Ethiopia and  
26 Gambia have also shown that left side body weakness is the most frequently reported clinical  
27 presentation (12, 18). On the other hand, studies conducted by Greffie *et al* (39), Gedefa *et al* (41),  
28 Masood *et al* (47), and Patne *et al* (38) reported that patients with stroke had motor-related  
29 symptom and focal neurological deficit. This disparity probably could be due to different site of  
30 infarction.  
31  
32  
33  
34  
35  
36  
37  
38  
39  
40  
41  
42  
43  
44

45 In FHSC, enalapril, nifedipine, and hydrochlorothiazide were the most frequently used past  
46 medication before patients admitted to the hospital. This finding is in line with various studies  
47 conducted on the management of hypertension with stroke (12).  
48  
49

50 ACE inhibitor and diuretics are widely used for the treatment of high blood pressure, which is the  
51 major modifiable risk factor for stroke. Reducing blood pressure, therefore, improves outcomes  
52 for patients with stroke. Various epidemiological studies done by Lawes *et al* (48), Elliott (49),  
53 Beckett *et al* (50) revealed that screening and lowering of both systolic blood pressure and diastolic  
54  
55  
56  
57

1  
2  
3 blood pressure was the most effective goal for reducing cardiovascular disease and for preventing  
4 recurrence and stroke mortality. In our setting, the mean length of hospitalization was found to be  
5 5.6 days, which is comparable with other studies conducted by Temesgen *et al* (6.7 days) (11) and  
6 Desita *et al* (6 days) (34). Conversely, the mean length of hospital stay at FHSCCH was shorter than  
7 the studies performed by Gedefa *et al* (41), Gebreyohannes *et al* (51), de Carvalho *et al* (52), and  
8 Walker *et al* (45), which were 11.14, 11.55, 15.4 and 19 days, respectively.  
9

10  
11 In this study setting, a significant proportion of stroke patients were died, referred to other health  
12 facilities, and discharged left against medical advice upon self and family requests rapidly. These  
13 disparities could be explained in various ways, such as availability of rehabilitation centres and  
14 other referral sites, treatment set up, costs for medication and beds, and quality of health care. In  
15 terms of management pattern, the combinations of acetylsalicylic acid and atorvastatin (65%) were  
16 used primarily in the ischemic stroke care in the study setting during hospitalization. This finding  
17 is in agreement with previous studies, which indicated that antiplatelet and dyslipidemias  
18 medications were frequently prescribed (11, 16, 53). The frequent usage might be due to the  
19 superior pharmacological effects of statins in reducing cardiovascular risks relative to other lipid-  
20 lowering agents, and antiplatelet is the most well-studied medications for the treatment of ischemic  
21 stroke (11, 54). However, this result contrasts with numerous studies performed by Bernheisel *et*  
22 *al* (55) and Adams *et al* (56), which stated that tissue plasminogen activator intravenous injection  
23 was primarily used in ischemic stroke treatment. This will possibly be attributed to the financial  
24 constraints and inaccessibility of tissue plasminogen activator in the study setting.  
25  
26

27  
28 Although the effectiveness of mannitol in hemorrhagic stroke needs further investigations, 44.7%  
29 of hemorrhagic stroke patients used mannitol to reduce cerebral edema. In 44.7% of hemorrhagic  
30 stroke patients, mannitol was used to reduce cerebral edema. This is inline with different clinical  
31 trials done by Wang *et al* (57) and Aminmansour *et al* (58) which reported that the initial use of  
32 mannitol at early stage seemed safe but might not reduce haemorrhage size. Cimetidine alone and  
33 the combinations of ceftriaxone, metronidazole, and cimetidine were the most widely used  
34 medications in the treatment of hospital-acquired infections and the prevention of stress-induced  
35 ulcer during hospitalization.  
36  
37

38  
39 Regarding the treatment outcome of stroke patients, the mortality rate was 16.9%. The rate is  
40 relatively higher than studies by Gebremariam *et al* (22), Kassaw (44), Greffie *et al* (39), Temesgen  
41 *et al* (11), Gebremariam *et al* (22), and de Carvalho *et al* (52). However, it is lower compared to  
42  
43  
44  
45  
46  
47  
48  
49  
50  
51

1  
2  
3 studies conducted at St. Paul's Teaching Hospital (30.1%) (41) and Jimma University Hospital  
4 (37.87%) (42). This disparity could be due to the different rate of hemorrhagic stroke condition,  
5 treatment pattern and comorbid conditions. In general, in our study, 53.8% of stroke patients had  
6 good outcomes while 46.2% had poor outcome (left with complication and died). The finding is  
7 in line with previous studies, where 54.8% and 59.2% of stroke patients had good outcome (11,  
8 41).

9  
10 Although respiratory failure secondary to aspiration pneumonia has not been significantly  
11 associated with treatment outcomes, it was a frequent contributor to death in our study setting. It  
12 is consistent with other hospital-based studies conducted at Gondar University Teaching Hospital  
13 (22) and China (53). Contrastingly, a study conducted in Rwanda found that initial presentation  
14 with severe stroke was the leading cause of death among patients with stroke (43).

15  
16 The binary logistic regression model analysis found that the treatment outcome was significantly  
17 associated with educational status, the time from the onset of symptoms to hospitalization, and  
18 types of stroke. This contrasts with the study in the Shashemene Referral Hospital, which showed  
19 that none of the independent variables was significantly associated with the outcome (11). This  
20 variation may be attributed to the small sample size (73 patients with stroke) in that study. The  
21 current research found that stroke patients with a high educational level have a better treatment  
22 outcome than patients with a low educational level. This result is similar to other previous research  
23 carried out at Nekemte Referral Hospital, which found that study participants with higher  
24 educational levels have better treatment outcomes (12). Educated participants may likely have  
25 improved access to information about their health status, better economic situation, better  
26 awareness about detecting and managing risk factors of stroke, and higher capacity to evaluate  
27 stressful events. Stroke patients with a low level of education are often believed to disregard self-  
28 management behavior and adherence to their medications. Consequently, the low educational  
29 status can contribute to the poor outcome of stroke patients.

30  
31 The study showed that the meantime, from the onset of symptoms to hospitalization, was found to  
32 be 23.67 hours. This is in line with other studies conducted by Temesgen *et al* (23.5 hours) (11)  
33 and Fekadu *et al* (24 hours) (12). Contrary to this finding, it was shorter than the studies conducted  
34 by Sagui *et al* (48 hours) (59) and Gebreyohannes *et al* (69.42 hours) (51). In contrast, it was  
35 delayed compared to other studies conducted by He Q *et al* (8 hours) (53) and de Carvalho *et al*  
36 (12.9 hours) (52). The difference might be due to the availability of transportation and nearby  
37  
38  
39  
40  
41  
42  
43  
44  
45  
46  
47  
48  
49  
50  
51  
52  
53  
54  
55  
56  
57

1  
2  
3 health facilities and knowledge of the patient for the clinical presentations of stroke. Patients who  
4 were delayed to come to the hospital had a poor treatment outcome compared to their counterparts.  
5 This finding is inconsistent with previous studies in Africa (22, 36, 60). It is advisable that hospital  
6 arrival within 3 hours of symptom onset to receive thrombolytic medications such as tissue  
7 plasminogen activator, to prevent disabilities and mortality from stroke (31). Delayed hospital  
8 admission creates difficulties in managing stroke and preventing complications in developing  
9 countries, including Ethiopia since early hours are crucial to delaying poor prognosis. Due to this  
10 reason, the majority of stroke patients in this study were not candidates for tissue plasminogen  
11 activators. Moreover, patients diagnosed with hemorrhagic stroke (AOR=2,68, 95% CI: 1,62-4,43,  
12 p<0,001) were found to have poor treatment outcome relative to ischemic stroke. This is in line  
13 with study done in Ethiopia and other African countries, which revealed hemorrhagic stroke was  
14 significantly more lethal than ischemic stroke (19, 35, 39, 61, 62).

15 Even though the presence of comorbid conditions and the development of complications were  
16 found to be significantly associated with poor treatment outcome in another study (12), our study  
17 did not show this finding. The difference could be attributed to the difference pattern of comorbid  
18 conditions.  
19  
20  
21  
22  
23

### 24 **Conclusion and recommendations**

25  
26 Approximately half of the stroke patients had poor treatment outcome. The most common stroke  
27 type was ischemic stroke. In addition, more than half of the patients had comorbid hypertension  
28 condition. During hospitalization, acetylsalicylic acid and atorvastatin combination agents were  
29 commonly used in stroke treatment. Further, education status, types of stroke, and the time from  
30 the onset of symptoms to admission were predictors of treatment outcome. Early identification of  
31 stroke type, risk factors and increasing patient awareness about stroke symptoms are vital to  
32 overcome stroke complications and mortality. Therefore, comprehensive health education on  
33 stroke should be given to the general public and specifically to stroke patients, while local  
34 healthcare providers should consider the above risk factors while managing stroke patients.  
35  
36  
37  
38  
39  
40  
41  
42  
43  
44  
45  
46  
47  
48  
49  
50

### 51 **Abbreviations**

52 AHA American heart association

53 FHSCH Felege Hiwot Specialized Comprehensive Hospital



RR Rate ratio

SPSS Statistical Package for the social sciences

WHO World health organization

### **Ethical approval**

The study was approved by the Ethical review board of Debre Tabor University, College of Health Sciences (Ref. No: DTU/RE/1/170/12). In addition, patient consent was waived by the Ethics Committee since the data was collected from medical records retrospectively. Patients' personnel information and clinical information were recorded by ensuring patient confidentiality. The study was conducted in accordance with the principles stated in the Declaration of Helsinki.

**Consent for Publication:** Not required

### **Availability of data and materials**

The datasets used and/or analyzed during the current study are available from the corresponding author on reasonable request.

### **Competing interests**

The authors have declared that no competing interests exist.

### **Author's contribution**

BK contributes in developing the idea, design of the study, statistical analysis, and interpretation of the data and write up the proposal and manuscript. AE and MM were involved in proposal development, design of the study, and manuscript writing. AD and GTT contributed to the design of the study and edition of the manuscript. All authors approved the submitted version of the manuscript critically.

### **Funding**

This work was supported by Debre Tabor University (grant no. DTU/RE/1/170/2012).

### **Acknowledgments**

We would like to acknowledge FHSC medical ward staffs and data abstractors for their valuable contribution towards this project.

## References

1. Group GBoDSE. Global, regional, and country-specific lifetime risks of stroke, 1990 and 2016. *New England Journal of Medicine*. 2018;379(25):2429-37.
2. Feigin VL, Norrving B, Mensah GA. Global burden of stroke. *Circulation research*. 2017;120(3):439-48.
3. Sacco RL, Kasner SE, Broderick JP, Caplan LR, Connors J, Culebras A, et al. An updated definition of stroke for the 21st century: a statement for healthcare professionals from the American Heart Association/American Stroke Association. *Stroke*. 2013;44(7):2064-89.
4. Feigin VL, Krishnamurthi R, Bhattacharjee R, Parmar P, Theadom A, Hussein T, et al. New strategy to reduce the global burden of stroke. *Stroke*. 2015;46(6):1740-7.
5. Fekadu G, Chelkeba L, Kebede A. Burden, clinical outcomes and predictors of time to in hospital mortality among adult patients admitted to stroke unit of Jimma university medical center: a prospective cohort study. *BMC neurology*. 2019;19(1):213.
6. Katan M, Luft A, editors. *Global burden of stroke*. Seminars in neurology; 2018: Thieme Medical Publishers.
7. Feigin VL, Roth GA, Naghavi M, Parmar P, Krishnamurthi R, Chugh S, et al. Global burden of stroke and risk factors in 188 countries, during 1990–2013: a systematic analysis for the Global Burden of Disease Study 2013. *The Lancet Neurology*. 2016;15(9):913-24.
8. Murray CJ, Vos T, Lozano R, Naghavi M, Flaxman AD, Michaud C, et al. Disability-adjusted life years (DALYs) for 291 diseases and injuries in 21 regions, 1990–2010: a systematic analysis for the Global Burden of Disease Study 2010. *The lancet*. 2012;380(9859):2197-223.
9. Mulat B, Mohammed J, Yeseni M, Alamirew M, Dermello M, Asemahagn MA. Magnitude of stroke and associated factors among patients who attended the medical ward of Felege Hiwot Referral Hospital, Bahir Dar town, Northwest Ethiopia. *Ethiopian Journal of Health Development*. 2016;30(3):129-34.
10. Godoy DA, Piñero GR, Koller P, Masotti L, Di Napoli M. Steps to consider in the approach and management of critically ill patient with spontaneous intracerebral hemorrhage. *World journal of critical care medicine*. 2015;4(3):213.
11. Temesgen TG, Teshome B, Njogu P. Treatment outcomes and associated factors among hospitalized stroke patients at Shashemene Referral Hospital, Ethiopia. *Stroke research and treatment*. 2018;2018.

12. Fekadu G, Adola B, Mosisa G, Shibiru T, Chelkeba L. Clinical characteristics and treatment outcomes among stroke patients hospitalized to Nekemte referral hospital, western Ethiopia. *Journal of Clinical Neuroscience*. 2020;71:170-6.
13. Berkowitz AL. Stroke and the noncommunicable diseases: A global burden in need of global advocacy. *Neurology*. 2015;84(21):2183-4.
14. Chen X, Zhou L, Zhang Y, Yi D, Liu L, Rao W, et al. Risk factors of stroke in Western and Asian countries: a systematic review and meta-analysis of prospective cohort studies. *BMC public health*. 2014;14(1):776.
15. Feigin VL, Lawes CM, Bennett DA, Anderson CS. Stroke epidemiology: a review of population-based studies of incidence, prevalence, and case-fatality in the late 20th century. *The Lancet Neurology*. 2003;2(1):43-53.
16. Abbasi V, Amani F, Aslanian R, Hoseinkhani A, Zakeri A, Masoumi R. Epidemiological Study of Stroke in Ardabil, Iran: a Hospital Based-Study. *J Neurol Disord Stroke*. 2017;5(3):1128.
17. Mozaffarian D, Benjamin E, Go A, Arnett D, Blaha M, Cushman M, et al. Heart disease and stroke statistics-2016 update: a report from the American Heart Association. *Circulation*. 2016;133(4):e38.
18. Garbusinski JM, van der Sande MA, Bartholome EJ, Dramaix MI, Gaye A, Coleman R, et al. Stroke presentation and outcome in developing countries: a prospective study in the Gambia. *Stroke*. 2005;36(7):1388-93.
19. Jowi J, Mativo P. Pathological sub-types, risk factors and outcome of stroke at the Nairobi hospital, Kenya. *East African medical journal*. 2008;85(12).
20. Owolabi MO, Arulogun O, Melikam S, Adeoye AM, Akarolo-Anthony S, Akinyemi R, et al. The burden of stroke in Africa: a glance at the present and a glimpse into the future. *Cardiovascular journal of Africa*. 2015;26(2 H3Africa Suppl):S27.
21. Al Khathaami AM, Al Bdah B, Alnosair A, Alturki A, Alrebdi R, Alwayili S, et al. Characteristics and Outcomes of Younger Adults with Embolic Stroke of Undetermined Source (ESUS): A Retrospective Study. *Stroke Research and Treatment*. 2019;2019.
22. Gebremariam SA, Yang HS. Types, risk profiles, and outcomes of stroke patients in a tertiary teaching hospital in northern Ethiopia. *eNeurologicalSci*. 2016;3:41-7.

23. Karthik L, Kumar G, Keswani T, Bhattacharyya A, Chandar SS, Rao KB. Protease inhibitors from marine actinobacteria as a potential source for antimalarial compound. *PloS one*. 2014;9(3).
24. Fekadu G, Chelkeba L, Kebede A. Risk factors, clinical presentations and predictors of stroke among adult patients admitted to stroke unit of Jimma university medical center, south west Ethiopia: prospective observational study. *BMC neurology*. 2019;19(1):1-11.
25. Connor M, Thorogood M, Casserly B, Dobson C, Warlow C. Prevalence of stroke survivors in rural South Africa: results from the Southern Africa Stroke Prevention Initiative (SASPI) Agincourt field site. *Stroke*. 2004;35(3):627-32.
26. Bazaldua OV, Davidson DA, Kripalani S. eChapter 1. Health Literacy and Medication Use. In: DiPiro JT, Talbert RL, Yee GC, Matzke GR, Wells BG, Posey LM, editors. *Pharmacotherapy: A Pathophysiologic Approach*, 9e. New York, NY: The McGraw-Hill Companies; 2014.
27. Collaborators GLRoS. Global, regional, and country-specific lifetime risks of stroke, 1990 and 2016. *New England Journal of Medicine*. 2018;379(25):2429-37.
28. Zenebe G, Alemayehu M, Asmera J. Characteristics and outcomes of stroke at Tikur Anbessa Teaching Hospital, Ethiopia. *Ethiopian medical journal*. 2005;43(4):251-9.
29. Girum T, Mesfin D, Bedewi J, Shewangizaw M. The Burden of Noncommunicable Diseases in Ethiopia, 2000–2016: Analysis of Evidence from Global Burden of Disease Study 2016 and Global Health Estimates 2016. *International Journal of Chronic Diseases*. 2020;2020.
30. Alemayehu B, Oli K. Stroke admission to Tikur Anbessa Teaching Hospital: with emphasis on stroke in the young. *Ethiopian Journal of Health Development*. 2002;16(3):309-15.
31. Powers WJ, Derdeyn CP, Biller J, Coffey CS, Hoh BL, Jauch EC, et al. 2015 American Heart Association/American Stroke Association focused update of the 2013 guidelines for the early management of patients with acute ischemic stroke regarding endovascular treatment: a guideline for healthcare professionals from the American Heart Association/American Stroke Association. *Stroke*. 2015;46(10):3020-35.
32. Chang T, Gajasinghe S, Arambepola C. Prevalence of stroke and its risk factors in urban Sri Lanka: population-based study. *Stroke*. 2015;46(10):2965-8.
33. Chhabra M, Sharma A, Ajay KR, Rathore MS. Assessment of risk factors, cost of treatment, and therapy outcome in stroke patients: evidence from cross-sectional study. *Expert review of pharmacoeconomics & outcomes research*. 2019;19(5):575-80.

- 1  
2  
3 34. Desita ZT, Zewdu WM. CT scan patterns of stroke at the University of Gondar Hospital,  
4 North West Ethiopia. *Journal of Advances in Medicine and Medical Research*. 2015:882-8.  
5  
6 35. Alkali NH, Bwala SA, Akano AO, Osi-Ogbu O, Alabi P, Ayeni OA. Stroke risk factors,  
7 subtypes, and 30-day case fatality in Abuja, Nigeria. *Nigerian medical journal: journal of the*  
8  
9  
10  
11  
12 36. Komolafe MA, Komolafe EO, Fatoye F, Asaleye C, Famurewa O, Mosaku S, et al. Profile  
13 of stroke in Nigerians: a prospective clinical study. 2007.  
14  
15 37. Atadzhanov M, N Mukomena P, Lakhi S, A Ross O, F Meschia J. Stroke characteristics  
16 and outcomes of adult patients admitted to the University Teaching Hospital, Lusaka, Zambia. *The*  
17  
18  
19  
20  
21 38. Patne SV, Chintale KN. Study of clinical profile of stroke patients in rural tertiary health  
22 care Centre. *Int J Adv Med*. 2016;3(3):666-70.  
23  
24 39. Greffie ES, Mitiku T, Getahun S. Risk factors, clinical pattern and outcome of stroke in a  
25 referral hospital, Northwest Ethiopia. *Clin Med Res*. 2015;4(6):182-8.  
26  
27 40. Zhang F-L, Guo Z-N, Wu Y-H, Liu H-Y, Luo Y, Sun M-S, et al. Prevalence of stroke and  
28 associated risk factors: a population based cross sectional study from northeast China. *BMJ open*.  
29  
30  
31 2017;7(9):e015758.  
32  
33 41. Gedefa B, Menna T, Berhe T, Abera H. Assessment of risk factors and treatment outcome  
34 of stroke admissions at St. Paul's teaching hospital, Addis Ababa, Ethiopia. *Journal of Neurology*  
35  
36  
37  
38 42. Beyene HADT. A Two Year Retrospective Cross-Sectional Study on Prevalence,  
39 associated Factors and Treatment outcome among Patients admitted to Medical Ward (Stroke  
40 Unit) at Jimma University Medical Center, Jimma, South West, Ethiopia, 2018. 2018.  
41  
42  
43 43. Nkusi AE, Muneza S, Nshuti S, Hakizimana D, Munyemana P, Nkeshimana M, et al.  
44 Stroke burden in Rwanda: A multicenter study of stroke management and outcome. *World*  
45  
46  
47  
48 44. Kassaw A. Prevalence, nursing managements and patients" outcomes among stroke  
49 patients admitted to Tikur Anbessa specialized hospital, Addis Ababa, Ethiopia, 2018: Addis  
50  
51  
52  
53 45. Walker RW, Rolfe M, Kelly PJ, George MO, James OF. Mortality and recovery after stroke  
54 in the Gambia. *Stroke*. 2003;34(7):1604-9.  
55  
56  
57

- 1
- 2
- 3
- 4 46. Rymer MM. Hemorrhagic stroke: intracerebral hemorrhage. *Mo Med*. 2011;108(1):50-4.
- 5 47. Masood CT, Hussain M, Abbasi S. Clinical presentation, risk factors and outcome of stroke
- 6 at a district level teaching hospital. *Journal of Ayub Medical College Abbottabad*. 2013;25(1-
- 7 2):49-51.
- 8
- 9
- 10 48. Lawes CM, Bennett DA, Feigin VL, Rodgers A. Blood pressure and stroke: an overview
- 11 of published reviews. *Stroke*. 2004;35(3):776-85.
- 12
- 13 49. Elliott WJ. Systemic hypertension. *Current problems in cardiology*. 2007;32(4):201-59.
- 14
- 15 50. Beckett NS, Peters R, Fletcher AE, Staessen JA, Liu L, Dumitrascu D, et al. Treatment of
- 16 hypertension in patients 80 years of age or older. *New England Journal of Medicine*.
- 17 2008;358(18):1887-98.
- 18
- 19 51. Gebreyohannes EA, Bhagavathula AS, Abebe TB, Seid MA, Haile KT. In-hospital
- 20 mortality among ischemic stroke patients in Gondar University Hospital: a retrospective cohort
- 21 study. *Stroke Research and Treatment*. 2019;2019.
- 22
- 23 52. de Carvalho JFF, Alves MB, Viana GÁA, Machado CB, dos Santos BFC, Kanamura AH,
- 24 et al. Stroke epidemiology, patterns of management, and outcomes in Fortaleza, Brazil: a hospital-
- 25 based multicenter prospective study. *Stroke*. 2011;42(12):3341-6.
- 26
- 27 53. He Q, Wu C, Luo H, Wang Z-Y, Ma X-Q, Zhao Y-F, et al. Trends in in-hospital mortality
- 28 among patients with stroke in China. *PloS one*. 2014;9(3).
- 29
- 30 54. Tirschwell DL, Ton TG, Ly KA, Van Ngo Q, Vo TT, Pham CH, et al. A prospective cohort
- 31 study of stroke characteristics, care, and mortality in a hospital stroke registry in Vietnam. *BMC*
- 32 *neurology*. 2012;12(1):150.
- 33
- 34 55. Bernheisel CR, Schlaudecker JD, Leopold K. Subacute management of ischemic stroke.
- 35 *American family physician*. 2011;84(12).
- 36
- 37 56. Adams H, Adams R, Del Zoppo G, Goldstein LB. Guidelines for the early management of
- 38 patients with ischemic stroke: 2005 guidelines update a scientific statement from the Stroke
- 39 Council of the American Heart Association/American Stroke Association. *Stroke*.
- 40 2005;36(4):916-23.
- 41
- 42 57. Wang X, Arima H, Yang J, Zhang S, Wu G, Woodward M, et al. Mannitol and outcome in
- 43 intracerebral hemorrhage: propensity score and multivariable intensive blood pressure reduction
- 44 in acute cerebral hemorrhage trial 2 results. *Stroke*. 2015;46(10):2762-7.
- 45
- 46
- 47
- 48
- 49
- 50
- 51
- 52
- 53
- 54
- 55
- 56
- 57
- 58
- 59
- 60

- 1  
2  
3 58. Aminmansour B, Tabesh H, Rezvani M, Poorjafari H. Effects of Mannitol 20% on  
4 Outcomes in Nontraumatic Intracerebral Hemorrhage. *Adv Biomed Res.* 2017;6:75-  
5  
6 59. Sagui E, M'Baye PS, Dubecq C, Ba Fall K, Niang A, Gning S, et al. Ischemic and  
7 hemorrhagic strokes in Dakar, Senegal: a hospital-based study. *Stroke.* 2005;36(9):1844-7.  
8  
9 60. Alemayehu CM, Birhanesilasie SK. Assessment of stroke patients: occurrence of unusually  
10 high number of haemorrhagic stroke cases in Tikur Anbessa Specialized Hospital, Addis Ababa,  
11 Ethiopia. *Clin Med Res.* 2013;2(5):94-100.  
12  
13 61. Connor MD, Walker R, Modi G, Warlow CP. Burden of stroke in black populations in sub-  
14 Saharan Africa. *The Lancet Neurology.* 2007;6(3):269-78.  
15  
16 62. Asefa G, Meseret S. CT and clinical correlation of stroke diagnosis, pattern and clinical  
17 outcome among stroke patients visting Tikur Anbessa Hospital. *Ethiopian medical journal.*  
18 2010;48(2):117-22.  
19  
20  
21  
22  
23  
24  
25  
26  
27  
28  
29  
30  
31  
32  
33  
34  
35  
36  
37  
38  
39  
40  
41  
42  
43  
44  
45  
46  
47  
48  
49  
50  
51  
52  
53  
54  
55  
56  
57  
58  
59  
60





Figure 1: Distribution of stroke patients by their outcomes.



Figure 2: Distribution of patient outcomes by duration of hospital stay

152x199mm (300 x 300 DPI)

**STROBE Statement—Checklist of items that should be included in reports of cross-sectional studies**

| Section/Topic                | Item # | Recommendation                                                                                                                                                                       | Reported on page # |
|------------------------------|--------|--------------------------------------------------------------------------------------------------------------------------------------------------------------------------------------|--------------------|
| <b>Title and abstract</b>    | 1      | (a) Indicate the study's design with a commonly used term in the title or the abstract                                                                                               | 1                  |
|                              |        | (b) Provide in the abstract an informative and balanced summary of what was done and what was found                                                                                  | 1-2                |
| <b>Introduction</b>          |        |                                                                                                                                                                                      | <b>1</b>           |
| Background/rationale         | 2      | Explain the scientific background and rationale for the investigation being reported                                                                                                 | 1-4                |
| Objectives                   | 3      | State specific objectives, including any prespecified hypotheses                                                                                                                     | 4                  |
| <b>Methods</b>               |        |                                                                                                                                                                                      |                    |
| Study design                 | 4      | Present key elements of study design early in the paper                                                                                                                              | 4                  |
| Setting                      | 5      | Describe the setting, locations, and relevant dates, including periods of recruitment, exposure, follow-up, and data collection                                                      | 4                  |
| Participants                 | 6      | (a) Give the eligibility criteria, and the sources and methods of selection of participants                                                                                          | 4                  |
| Variables                    | 7      | Clearly define all outcomes, exposures, predictors, potential confounders, and effect modifiers. Give diagnostic criteria, if applicable                                             | NA                 |
| Data sources/<br>measurement | 8*     | For each variable of interest, give sources of data and details of methods of assessment (measurement). Describe comparability of assessment methods if there is more than one group | NA                 |
| Bias                         | 9      | Describe any efforts to address potential sources of bias                                                                                                                            | NA                 |
| Study size                   | 10     | Explain how the study size was arrived at                                                                                                                                            | 5                  |
| Quantitative variables       | 11     | Explain how quantitative variables were handled in the analyses. If applicable, describe which groupings were chosen and why                                                         | 5                  |
| Statistical methods          | 12     | (a) Describe all statistical methods, including those used to control for confounding                                                                                                | 5                  |
|                              |        | (b) Describe any methods used to examine subgroups and interactions                                                                                                                  | 5                  |
|                              |        | (c) Explain how missing data were addressed                                                                                                                                          | NA                 |
|                              |        | (d) If applicable, describe analytical methods taking account of sampling strategy                                                                                                   | NA                 |
|                              |        | (e) Describe any sensitivity analyses                                                                                                                                                | NA                 |
| <b>Results</b>               |        |                                                                                                                                                                                      |                    |

|                          |     |                                                                                                                                                                                                              |       |
|--------------------------|-----|--------------------------------------------------------------------------------------------------------------------------------------------------------------------------------------------------------------|-------|
| Participants             | 13* | (a) Report numbers of individuals at each stage of study—eg numbers potentially eligible, examined for eligibility, confirmed eligible, included in the study, completing follow-up, and analysed            | 6-7   |
|                          |     | (b) Give reasons for non-participation at each stage                                                                                                                                                         | NA    |
|                          |     | (c) Consider use of a flow diagram                                                                                                                                                                           | NA    |
| Descriptive data         | 14* | (a) Give characteristics of study participants (eg demographic, clinical, social) and information on exposures and potential confounders                                                                     | 6     |
|                          |     | (b) Indicate number of participants with missing data for each variable of interest                                                                                                                          | 7     |
| Outcome data             | 15* | Report numbers of outcome events or summary measures                                                                                                                                                         | 11    |
| Main results             | 16  | (a) Give unadjusted estimates and, if applicable, confounder-adjusted estimates and their precision (eg, 95% confidence interval). Make clear which confounders were adjusted for and why they were included | 12    |
|                          |     | (b) Report category boundaries when continuous variables were categorized                                                                                                                                    | 12    |
|                          |     | (c) If relevant, consider translating estimates of relative risk into absolute risk for a meaningful time period                                                                                             | NA    |
| Other analyses           | 17  | Report other analyses done—eg analyses of subgroups and interactions, and sensitivity analyses                                                                                                               | NA    |
| <b>Discussion</b>        |     |                                                                                                                                                                                                              | 13-17 |
| Key results              | 18  | Summarise key results with reference to study objectives                                                                                                                                                     | 17    |
| Limitations              | 19  | Discuss limitations of the study, taking into account sources of potential bias or imprecision. Discuss both direction and magnitude of any potential bias                                                   | 17    |
| Interpretation           | 20  | Give a cautious overall interpretation of results considering objectives, limitations, multiplicity of analyses, results from similar studies, and other relevant evidence                                   | NA    |
| Generalisability         | 21  | Discuss the generalisability (external validity) of the study results                                                                                                                                        | NA    |
| <b>Other information</b> |     |                                                                                                                                                                                                              | 17-18 |
| Funding                  | 22  | Give the source of funding and the role of the funders for the present study and, if applicable, for the original study on which the present article is based                                                | 18    |

\*Give information separately for cases and controls in case-control studies and, if applicable, for exposed and unexposed groups in cohort and cross-sectional studies.

**Note:** An Explanation and Elaboration article discusses each checklist item and gives methodological background and published examples of transparent reporting. The STROBE checklist is best used in conjunction with this article (freely available on the Web sites of PLoS Medicine at <http://www.plosmedicine.org/>, Annals of Internal Medicine at <http://www.annals.org/>, and Epidemiology at <http://www.epidem.com/>). Information on the STROBE Initiative is available at [www.strobe-statement.org](http://www.strobe-statement.org).
